# Supplementary material for: Phytochemistry and Biological Activities of Endophytic Fungi from the Meliaceae Family
Source: MDPI journal article supplement (doi:10.3390/molecules28020778), 2023-01-12
Supplement: s1 [file s1]

*Review*

# Phytochemistry and Biological Activities of Endophytic Fungi from the Meliaceae Family

Yeni Mulyani <sup>1,2</sup>, Siska Elisahbet Sinaga <sup>3</sup> and Unang Supratman <sup>1,3,\*</sup>

<sup>1</sup> Department of Chemistry, Faculty of Mathematic and Natural Sciences, Universitas Padjadjaran, Sumedang 45363, Indonesia

<sup>2</sup> Department of Marine Science, Faculty of Fisheries and Marine Science, Universitas Padjadjaran, Sumedang 45363, Indonesia

<sup>3</sup> Central Laboratory, Universitas Padjadjaran, Sumedang 45363, Indonesia

\* Correspondence: unang.supratman@unpad.ac.id; Tel.: +62-22-779-4391

## Supplementary Materials

**Table S1.** Secondary Metabolites Derived from Endophytic fungi-Meliaceae

**Table S2.** Antimicrobial Activity of Compounds that have been evaluated against several fungi and bacteria

**Table S3.** Cytotoxic Activity of compounds (165–174) against Several Cells

**Table S1.** Secondary Metabolites Derived from Endophytic fungi-Meliaceae.

| Compounds                                                                                                               | Molecular Formula                               | Molecular Mass | Fungal Strains               | Host Plant                | Plant Parts                                  | Fermentation Media                   | Ref. |
|-------------------------------------------------------------------------------------------------------------------------|-------------------------------------------------|----------------|------------------------------|---------------------------|----------------------------------------------|--------------------------------------|------|
| <b>Terpenoids</b>                                                                                                       |                                                 |                |                              |                           |                                              |                                      |      |
| Merulin A (1)                                                                                                           | C <sub>14</sub> H <sub>22</sub> O <sub>4</sub>  | 254.1518       | XG8D                         | <i>X. granatum</i>        | Leaves                                       | Corn steep-containing medium (broth) | [31] |
| Merulin B (2)                                                                                                           | C <sub>15</sub> H <sub>24</sub> O <sub>5</sub>  | 284.1624       | XG8D                         | <i>X. granatum</i>        | Leaves                                       | Corn steep-containing medium (broth) | [31] |
| Merulin C (3)                                                                                                           | C <sub>15</sub> H <sub>22</sub> O <sub>5</sub>  | 282.1467       | XG8D                         | <i>X. granatum</i>        | Leaves                                       | Corn steep-containing medium (broth) | [31] |
| Helvolic acid (4)                                                                                                       | C <sub>33</sub> H <sub>44</sub> O <sub>8</sub>  | 568.3036       | <i>A. fumigatus</i> LN-4     | <i>M. azedarach</i>       | Stem bark                                    | PD liquid medium                     | [32] |
| Azadirachtin A (5)                                                                                                      | C <sub>35</sub> H <sub>44</sub> O <sub>16</sub> | 720.714        | <i>E. parvum</i>             | <i>A. indica</i> A. Juss. | Seeds. Leaves, Stem/Twigs, Inner Bark, Roots | Sabouraud dextrose broth (SB)        | [33] |
| Azadirachtin B (6)                                                                                                      | C <sub>33</sub> H <sub>42</sub> O <sub>14</sub> | 662.681        | <i>E. parvum</i>             | <i>A. indica</i> A. Juss. | Seeds. Leaves, Stem/Twigs, Inner Bark, Roots | Sabouraud dextrose broth (SB)        | [33] |
| Pycnophorin (7)                                                                                                         | C <sub>27</sub> H <sub>40</sub> O <sub>4</sub>  | 428.2927       | <i>B. dothidea</i> KJ-1      | <i>M. azedarach</i> L.    | Stem                                         | Rice                                 | [34] |
| (1 <i>S</i> ,4 <i>S</i> ,5 <i>R</i> ,7 <i>R</i> ,10 <i>R</i> ,11 <i>R</i> )-guaiane-5,10,11,12-tetraol (8)              | C <sub>15</sub> H <sub>28</sub> O <sub>4</sub>  | 272.1988       | <i>Xylaria</i> sp. YM 311647 | <i>A. indica</i> A Juss   | Stem                                         | PDA, PDB                             | [35] |
| (1 <i>S</i> ,4 <i>S</i> ,5 <i>S</i> ,7 <i>R</i> ,10 <i>R</i> ,11 <i>S</i> )-guaiane-1,10,11,12-tetraol (9)              | C <sub>15</sub> H <sub>28</sub> O <sub>4</sub>  | 272.1988       | <i>Xylaria</i> sp. YM 311647 | <i>A. indica</i> A Juss   | Stem                                         | PDA, PDB                             | [35] |
| (1 <i>S</i> ,4 <i>S</i> ,5 <i>R</i> ,7 <i>R</i> ,10 <i>R</i> ,11 <i>S</i> )-guaiane-5,10,11,12-tetraol (10)             | C <sub>15</sub> H <sub>28</sub> O <sub>4</sub>  | 272.1988       | <i>Xylaria</i> sp. YM 311647 | <i>A. indica</i> A Juss   | Stem                                         | PDA, PDB                             | [35] |
| (1 <i>S</i> ,4 <i>S</i> ,5 <i>S</i> ,7 <i>R</i> ,10 <i>R</i> ,11 <i>R</i> )-guaiane-1,10,11,12-tetraol (11)             | C <sub>15</sub> H <sub>28</sub> O <sub>4</sub>  | 272.1988       | <i>Xylaria</i> sp. YM 311647 | <i>A. indica</i> A Juss   | Stem                                         | PDA, PDB                             | [35] |
| (1 <i>R</i> ,3 <i>S</i> ,4 <i>R</i> ,5 <i>S</i> ,7 <i>R</i> ,10 <i>R</i> ,11 <i>S</i> )-guaiane-3,10,11,12-tetraol (12) | C <sub>15</sub> H <sub>28</sub> O <sub>5</sub>  | 288.1937       | <i>Xylaria</i> sp. YM 311647 | <i>A. indica</i> A Juss   | Stem                                         | PDA, PDB                             | [35] |
| (1 <i>R</i> ,3 <i>R</i> ,4 <i>R</i> ,5 <i>S</i> ,7 <i>R</i> ,10 <i>R</i> ,11 <i>R</i> )-guaiane-3,10,11,12-tetraol (13) | C <sub>15</sub> H <sub>28</sub> O <sub>4</sub>  | 272.1988       | <i>Xylaria</i> sp. YM 311647 | <i>A. indica</i> A Juss   | Stem                                         | PDA, PDB                             | [35] |
| (1 <i>R</i> ,4 <i>S</i> ,5 <i>S</i> ,7 <i>S</i> ,9 <i>R</i> ,10 <i>S</i> ,11 <i>R</i> )-guaiane-9,10,11,12-tetraol (14) | C <sub>15</sub> H <sub>28</sub> O <sub>4</sub>  | 272.1988       | <i>Xylaria</i> sp. YM 311647 | <i>A. indica</i> A Juss   | Stem                                         | PDA, PDB                             | [35] |
| (1 <i>R</i> ,4 <i>S</i> ,5 <i>S</i> ,7 <i>R</i> ,10 <i>R</i> ,11 <i>S</i> )-guaiane-10,11,12-triol (15)                 | C <sub>15</sub> H <sub>28</sub> O <sub>3</sub>  | 256.2038       | <i>Xylaria</i> sp. YM 311647 | <i>A. indica</i> A Juss   | Stem                                         | PDA, PDB                             | [35] |

|                                                                                                                  |                                                  |          |                              |                          |                          |                   |      |
|------------------------------------------------------------------------------------------------------------------|--------------------------------------------------|----------|------------------------------|--------------------------|--------------------------|-------------------|------|
| (1 <i>R</i> ,4 <i>S</i> ,5 <i>S</i> ,7 <i>R</i> ,10 <i>R</i> ,11 <i>R</i> )-guaiane-10,11,12-triol ( <b>16</b> ) | C <sub>15</sub> H <sub>28</sub> O <sub>3</sub>   | 256.2038 | <i>Xylaria</i> sp. YM 311647 | <i>A. indica</i> A Juss  | Stem                     | PDA, PDB          | [35] |
| 14 <i>α</i> ,16-epoxy-18-norisopimar-7-en-4 <i>α</i> -ol ( <b>17</b> )                                           | C <sub>19</sub> H <sub>30</sub> O <sub>2</sub>   | 290.2246 | <i>Xylaria</i> sp. YM 311647 | <i>A. indica</i> A Juss  | Stem                     | PDA, PDB          | [35] |
| 16- <i>O</i> -sulfo-18-norisopimar-7-en-4 <i>α</i> ,16-diol ( <b>18</b> )                                        | C <sub>19</sub> H <sub>32</sub> O <sub>5</sub> S | 372.1970 | <i>Xylaria</i> sp. YM 311647 | <i>A. indica</i> A Juss  | Stem                     | PDA, PDB          | [35] |
| 9-deoxy-hymatoxin A ( <b>19</b> )                                                                                | C <sub>20</sub> H <sub>30</sub> O <sub>6</sub> S | 398.1763 | <i>Xylaria</i> sp. YM 311647 | <i>A. indica</i> A Juss  | Stem                     | PDA, PDB          | [35] |
| guaiane-2,10,11,12-tetraol ( <b>20</b> )                                                                         | C <sub>15</sub> H <sub>28</sub> O <sub>4</sub>   | 272.1988 | <i>Xylaria</i> sp. YM 311647 | <i>A. indica</i> A Juss  | Stem                     | PDA, PDB          | [36] |
| guaiane-2,4,10,11,12-pentaol ( <b>21</b> )                                                                       | C <sub>15</sub> H <sub>28</sub> O <sub>5</sub>   | 288.1937 | <i>Xylaria</i> sp. YM 311647 | <i>A. indica</i> A Juss  | Stem                     | PDA, PDB          | [36] |
| guaiane-4,5,10,11,12-pentaol ( <b>22</b> )                                                                       | C <sub>15</sub> H <sub>28</sub> O <sub>5</sub>   | 288.1937 | <i>Xylaria</i> sp. YM 311647 | <i>A. indica</i> A Juss  | Stem                     | PDA, PDB          | [36] |
| guaiane-1,5,10,11,12-pentaol ( <b>23</b> )                                                                       | C <sub>15</sub> H <sub>28</sub> O <sub>5</sub>   | 288.1937 | <i>Xylaria</i> sp. YM 311647 | <i>A. indica</i> A Juss  | Stem                     | PDA, PDB          | [36] |
| 11-methoxyguaiane-4,10,12-triol ( <b>24</b> )                                                                    | C <sub>16</sub> H <sub>30</sub> O <sub>4</sub>   | 286.2144 | <i>Xylaria</i> sp. YM 311647 | <i>A. indica</i> A Juss  | Stem                     | PDA, PDB          | [36] |
| (9 <i>R</i> , 10 <i>R</i> )-dihydroharzianone ( <b>25</b> )                                                      | C <sub>20</sub> H <sub>32</sub> O                | 288.2453 | <i>Trichoderma</i> sp. Xy24  | <i>X. granatum</i>       | Leaves, Stems, and Peels | PDA liquid medium | [37] |
| Harzianelactone ( <b>26</b> )                                                                                    | C <sub>20</sub> H <sub>30</sub> O <sub>2</sub>   | 302.2246 | <i>Trichoderma</i> sp. Xy24  | <i>X. granatum</i>       | Leaves, Stems, and Peels | PDA liquid medium | [37] |
| Pestaloporinate A ( <b>27</b> )                                                                                  | C <sub>21</sub> H <sub>32</sub> O <sub>7</sub>   | 396.2148 | <i>Pestalotiopsis</i> sp.    | <i>M. azaderach</i> Linn | Stem Bark                | PDB               | [38] |
| Pestaloporinate B ( <b>28</b> )                                                                                  | C <sub>19</sub> H <sub>26</sub> O <sub>6</sub>   | 350.1729 | <i>Pestalotiopsis</i> sp.    | <i>M. azaderach</i> Linn | Stem Bark                | PDB               | [38] |
| Pestaloporinate C ( <b>29</b> )                                                                                  | C <sub>18</sub> H <sub>26</sub> O <sub>5</sub>   | 322.1780 | <i>Pestalotiopsis</i> sp.    | <i>M. azaderach</i> Linn | Stem Bark                | PDB               | [38] |
| Pestaloporinate D ( <b>30</b> )                                                                                  | C <sub>18</sub> H <sub>26</sub> O <sub>5</sub>   | 322.1780 | <i>Pestalotiopsis</i> sp.    | <i>M. azaderach</i> Linn | Stem Bark                | PDB               | [38] |
| Pestaloporinate E ( <b>31</b> )                                                                                  | C <sub>20</sub> H <sub>32</sub> O <sub>6</sub>   | 368.2199 | <i>Pestalotiopsis</i> sp.    | <i>M. azaderach</i> Linn | Stem Bark                | PDB               | [38] |
| Pestaloporinate F ( <b>32</b> )                                                                                  | C <sub>18</sub> H <sub>28</sub> O <sub>4</sub>   | 308.1988 | <i>Pestalotiopsis</i> sp.    | <i>M. azaderach</i> Linn | Stem Bark                | PDB               | [38] |
| Pestaloporinate G ( <b>33</b> )                                                                                  | C <sub>19</sub> H <sub>30</sub> O <sub>4</sub>   | 322.2144 | <i>Pestalotiopsis</i> sp.    | <i>M. azaderach</i> Linn | Stem Bark                | PDB               | [38] |
| 14-acetylhumulane ( <b>34</b> )                                                                                  | C <sub>16</sub> H <sub>22</sub> O <sub>5</sub>   | 294.1467 | <i>Pestalotiopsis</i> sp.    | <i>M. azaderach</i> Linn | Stem Bark                | PDB               | [38] |

|                                                       |                                                |          |                             |                       |           |                                |      |
|-------------------------------------------------------|------------------------------------------------|----------|-----------------------------|-----------------------|-----------|--------------------------------|------|
| Merulinol A (35)                                      | C <sub>14</sub> H <sub>22</sub> O <sub>4</sub> | 254.1518 | XG8D                        | <i>X. granatum</i>    | Leaves    | Sabouraud Dextrose Broth (SDB) | [39] |
| Merulinol B (36)                                      | C <sub>15</sub> H <sub>26</sub> O <sub>3</sub> | 254.1882 | XG8D                        | <i>X. granatum</i>    | Leaves    | Sabouraud Dextrose Broth (SDB) | [39] |
| Merulinol C (37)                                      | C <sub>16</sub> H <sub>26</sub> O <sub>3</sub> | 266.1882 | XG8D                        | <i>X. granatum</i>    | Leaves    | Sabouraud Dextrose Broth (SDB) | [39] |
| Merulinol D (38)                                      | C <sub>16</sub> H <sub>26</sub> O <sub>3</sub> | 266.1882 | XG8D                        | <i>X. granatum</i>    | Leaves    | Sabouraud Dextrose Broth (SDB) | [39] |
| Merulinol E (39)                                      | C <sub>15</sub> H <sub>20</sub> O <sub>4</sub> | 264.1362 | XG8D                        | <i>X. granatum</i>    | Leaves    | Sabouraud Dextrose Broth (SDB) | [39] |
| Merulinol F (40)                                      | C <sub>15</sub> H <sub>24</sub> O <sub>5</sub> | 284.1624 | XG8D                        | <i>X. granatum</i>    | Leaves    | Sabouraud Dextrose Broth (SDB) | [39] |
| Aciicolinol C (41)                                    | C <sub>15</sub> H <sub>24</sub> O <sub>4</sub> | 268.1675 | XG8D                        | <i>X. granatum</i>    | Leaves    | Sabouraud Dextrose Broth (SDB) | [39] |
| Aciicolinol K (42)                                    | C <sub>15</sub> H <sub>22</sub> O <sub>5</sub> | 282.1467 | XG8D                        | <i>X. granatum</i>    | Leaves    | Sabouraud Dextrose Broth (SDB) | [39] |
| Aciicolinol F (43)                                    | C <sub>15</sub> H <sub>24</sub> O <sub>3</sub> | 252.1725 | XG8D                        | <i>X. granatum</i>    | Leaves    | Sabouraud Dextrose Broth (SDB) | [39] |
| Aciicolinol D (44)                                    | C <sub>15</sub> H <sub>24</sub> O <sub>3</sub> | 252.1725 | XG8D                        | <i>X. granatum</i>    | Leaves    | Sabouraud Dextrose Broth (SDB) | [39] |
| Colletotrin (45)                                      | C <sub>29</sub> H <sub>42</sub> O <sub>9</sub> | 534.2829 | <i>C. gloeosporioides</i>   | <i>T. monadelph</i>   | Stem bark | Rice                           | [27] |
| Hydroheptelidic acid (46)                             | C <sub>15</sub> H <sub>22</sub> O <sub>5</sub> | 282.1467 | <i>C. gloeosporioides</i>   | <i>T. monadelph</i>   | Stem bark | Rice                           | [27] |
| (7R,10S)-7,10-epoxysydonic acid (47)                  | C <sub>15</sub> H <sub>20</sub> O <sub>4</sub> | 264.1362 | <i>Aspergillus</i> sp. xy02 | <i>X. moluccensis</i> | Leaves    | Rice + Sea Salt                | [40] |
| (7S,10S)-7,10-epoxysydonic acid (48)                  | C <sub>15</sub> H <sub>20</sub> O <sub>4</sub> | 264.1362 | <i>Aspergillus</i> sp. xy02 | <i>X. moluccensis</i> | Leaves    | Rice + Sea Salt                | [40] |
| (7R,11S)-7,12-epoxysydonic acid (49)                  | C <sub>15</sub> H <sub>20</sub> O <sub>4</sub> | 264.1362 | <i>Aspergillus</i> sp. xy02 | <i>X. moluccensis</i> | Leaves    | Rice + Sea Salt                | [40] |
| (7S,11S)-7,12-epoxysydonic acid (50)                  | C <sub>15</sub> H <sub>20</sub> O <sub>4</sub> | 264.1362 | <i>Aspergillus</i> sp. xy02 | <i>X. moluccensis</i> | Leaves    | Rice + Sea Salt                | [40] |
| 7-deoxy-7,14-didehydro-12-hydroxysydonic acid (51)    | C <sub>15</sub> H <sub>20</sub> O <sub>4</sub> | 264.1362 | <i>Aspergillus</i> sp. xy02 | <i>X. moluccensis</i> | Leaves    | Rice + Sea Salt                | [40] |
| (Z)-7-deoxy-7,8-didehydro-12-hydroxysydonic acid (52) | C <sub>15</sub> H <sub>20</sub> O <sub>4</sub> | 264.1362 | <i>Aspergillus</i> sp. xy02 | <i>X. moluccensis</i> | Leaves    | Rice + Sea Salt                | [40] |
| (E)-7-deoxy-7,8-didehydro-12-hydroxysydonic acid (53) | C <sub>15</sub> H <sub>20</sub> O <sub>4</sub> | 264.1362 | <i>Aspergillus</i> sp. xy02 | <i>X. moluccensis</i> | Leaves    | Rice + Sea Salt                | [40] |
| (+)-1-hydroxyboivinianic acid (54)                    | C <sub>12</sub> H <sub>12</sub> O <sub>5</sub> | 236.0685 | <i>Aspergillus</i> sp. xy02 | <i>X. moluccensis</i> | Leaves    | Rice + Sea Salt                | [40] |
| engyodontiumone I (55)                                | C <sub>15</sub> H <sub>20</sub> O <sub>4</sub> | 264.1362 | <i>Aspergillus</i> sp. xy02 | <i>X. moluccensis</i> | Leaves    | Rice + Sea Salt                | [40] |
| (+)-sydonic acid (56)                                 | C <sub>15</sub> H <sub>22</sub> O <sub>4</sub> | 266.1518 | <i>Aspergillus</i> sp. xy02 | <i>X. moluccensis</i> | Leaves    | Rice + Sea Salt                | [40] |
| (+)-hydroxysydonic acid (57)                          | C <sub>15</sub> H <sub>22</sub> O <sub>5</sub> | 282.1467 | <i>Aspergillus</i> sp. xy02 | <i>X. moluccensis</i> | Leaves    | Rice + Sea Salt                | [40] |
| (-)-(7S)-10-hydroxysydonic acid (58)                  | C <sub>15</sub> H <sub>22</sub> O <sub>5</sub> | 282.1467 | <i>Aspergillus</i> sp. xy02 | <i>X. moluccensis</i> | Leaves    | Rice + Sea Salt                | [40] |

|                                                                                                  |                                                |          |                                                   |                                              |        |                                                              |              |
|--------------------------------------------------------------------------------------------------|------------------------------------------------|----------|---------------------------------------------------|----------------------------------------------|--------|--------------------------------------------------------------|--------------|
| Guaidiol (59)                                                                                    | C <sub>17</sub> H <sub>30</sub> O              | 250.2297 | <i>Xylaria</i> sp. HNWSW-2                        | <i>X. granatum</i>                           | Stem   | Rice                                                         | [41]         |
| Penicieudesmol A (60)                                                                            | C <sub>15</sub> H <sub>26</sub> O <sub>2</sub> | 238.2933 | <i>Penicillium</i> sp. J-54                       | <i>C. tagal</i>                              | Leaves | Potato and Glucose Broth                                     | [25]         |
| Penicieudesmol B (61)                                                                            | C <sub>15</sub> H <sub>26</sub> O <sub>3</sub> | 254.1882 | <i>Penicillium</i> sp. J-54                       | <i>C. tagal</i>                              | Leaves | Potato and Glucose Broth                                     | [25]         |
| Penicieudesmol C (62)                                                                            | C <sub>15</sub> H <sub>26</sub> O <sub>3</sub> | 254.1882 | <i>Penicillium</i> sp. J-54                       | <i>C. tagal</i>                              | Leaves | Potato and Glucose Broth                                     | [25]         |
| Penicieudesmol D (63)                                                                            | C <sub>15</sub> H <sub>26</sub> O <sub>4</sub> | 270.1831 | <i>Penicillium</i> sp. J-54                       | <i>C. tagal</i>                              | Leaves | Potato and Glucose Broth                                     | [25]         |
| Hydroxyldecandrin G (64)                                                                         | C <sub>20</sub> H <sub>28</sub> O <sub>4</sub> | 332.1988 | <i>Xylaria</i> sp. XC-16                          | <i>T. sinensis</i>                           | Leaves | PD liquid medium                                             | [42]         |
| <b>Steroids</b>                                                                                  |                                                |          |                                                   |                                              |        |                                                              |              |
| Ergokonin B (65)                                                                                 | C <sub>28</sub> H <sub>42</sub> O <sub>5</sub> | 458.3032 | <i>Fusarium</i> sp. LN-11                         | <i>M. azedarach</i>                          | Leaves | Liquid Culture                                               | [21]         |
| Cervisterol (66)                                                                                 | C <sub>28</sub> H <sub>46</sub> O <sub>3</sub> | 430.3447 | <i>Fusarium</i> sp. LN-11                         | <i>M. azedarach</i>                          | Leaves | Liquid Culture                                               | [21]         |
| Ergosterol peroxide (67)                                                                         | C <sub>28</sub> H <sub>44</sub> O <sub>3</sub> | 428.3290 | <i>F. phaseoli</i>                                | <i>C. macrophyllus</i>                       | Root   | Unpolished brown rice                                        | [43]         |
|                                                                                                  |                                                |          | <i>B. dothidea</i> KJ-1                           | <i>M. azedarach</i> L.                       | Stem   | Rice                                                         | [44]         |
|                                                                                                  |                                                |          | <i>F. phaseoli</i>                                | <i>C. macrophyllus</i>                       | Root   | Unpolished brown rice                                        | [43]         |
| β-sitosterol glucoside (68)                                                                      | C <sub>34</sub> H <sub>58</sub> O <sub>6</sub> | 562.4233 | <i>B. dothidea</i> KJ-1                           | <i>M. azedarach</i> L.                       | Stem   | Rice                                                         | [44]         |
| Ergosterol (69)                                                                                  | C <sub>28</sub> H <sub>44</sub> O              | 396.3392 | <i>Eupenicillium</i> sp. HJ002                    | <i>X. granatum</i>                           |        | Potato Liquid Medium (33g sea salt in 1L of potato infusion) | [22]         |
| 5β,6β-epoxy-3β,15α-dihydroxy-(22 <i>E</i> ,24 <i>R</i> )-ergosta-8(14),22-dien-7-one (70)        | C <sub>28</sub> H <sub>42</sub> O <sub>4</sub> | 442.3083 | <i>F. phaseoli</i><br><i>Phomopsis</i> sp. MGF222 | <i>C. macrophyllus</i><br><i>X. granatum</i> | Root   | Unpolished brown rice<br>Potato Liquid Medium + Sea Salt     | [22]<br>[45] |
| 5β,6β-epoxy-3β,7α-dihydroxy(22 <i>E</i> ,24 <i>R</i> )-ergosta-8(14),22-dien-15-one (71)         | C <sub>28</sub> H <sub>42</sub> O <sub>4</sub> | 442.3083 | <i>Phomopsis</i> sp. MGF222                       | <i>X. granatum</i>                           |        | Potato Liquid Medium + Sea Salt                              | [45]         |
| 5β,6β-epoxy-3β,7α,9α-trihydroxy-(22 <i>E</i> ,24 <i>R</i> )-ergosta-8(14),22-dien-15-one (72)    | C <sub>28</sub> H <sub>42</sub> O <sub>5</sub> | 458.3032 | <i>Phomopsis</i> sp. MGF222                       | <i>X. granatum</i>                           |        | Potato Liquid Medium + Sea Salt                              | [45]         |
| 3β,9α,15α-trihydroxy-(22 <i>E</i> ,24 <i>R</i> )-10(5→4)abeo-ergosta-6,8(14),22-trien-5-one (73) | C <sub>28</sub> H <sub>42</sub> O <sub>4</sub> | 442.3083 | <i>Phomopsis</i> sp. MGF222                       | <i>X. granatum</i>                           |        | Potato Liquid Medium + Sea Salt                              | [45]         |
| 3,15-dihydroxyl-(22 <i>E</i> ,24 <i>R</i> )-ergosta-5,8(14),22trien-7-one (74)                   | C <sub>28</sub> H <sub>42</sub> O <sub>3</sub> | 426.3134 | <i>Phomopsis</i> sp. MGF222                       | <i>X. granatum</i>                           |        | Potato Liquid Medium + Sea Salt                              | [45]         |
| (22 <i>E</i> ,24 <i>R</i> )-ergosta-4,6,8(14),22-tetraen-3,15-dione (75)                         | C <sub>28</sub> H <sub>38</sub> O <sub>2</sub> | 406.2872 | <i>Phomopsis</i> sp. MGF222                       | <i>X. granatum</i>                           |        | Potato Liquid Medium + Sea Salt                              | [45]         |

|                                                                       |                                                               |          |                             |                        |           |                       |      |
|-----------------------------------------------------------------------|---------------------------------------------------------------|----------|-----------------------------|------------------------|-----------|-----------------------|------|
| Ergost-5,22E-dien-3 $\beta$ -oleate-20-ol (76)                        | C <sub>47</sub> H <sub>80</sub> O <sub>3</sub>                | 692.6107 | <i>F. phaseoli</i>          | <i>C. macrophyllus</i> | Root      | Unpolished brown rice | [43] |
| Atroside (77)                                                         | C <sub>51</sub> H <sub>90</sub> O <sub>7</sub>                | 814.6687 | <i>F. phaseoli</i>          | <i>C. macrophyllus</i> | Root      | Unpolished brown rice | [43] |
| <b>Meroterpenes</b>                                                   |                                                               |          |                             |                        |           |                       |      |
| Preaustinoid A (78)                                                   | C <sub>26</sub> H <sub>36</sub> O <sub>6</sub>                | 444.2508 | <i>Penicillium</i> sp.      | <i>M. azedarach</i>    | Root bark | Rice                  | [46] |
| Preaustinoid B (79)                                                   | C <sub>26</sub> H <sub>36</sub> O <sub>6</sub>                | 444.2505 | <i>Penicillium</i> sp.      | <i>M. azedarach</i>    | Root bark | Rice                  | [46] |
| Preaustinoid A1 (80)                                                  | C <sub>26</sub> H <sub>36</sub> O <sub>7</sub>                | 460.2461 | <i>P. brasilianum</i>       | <i>M. azedarach</i>    | Root bark | Rice                  | [47] |
| Preaustinoid B2 (81)                                                  | C <sub>24</sub> H <sub>34</sub> O <sub>5</sub>                | 402.2406 | <i>P. brasilianum</i>       | <i>M. azedarach</i>    | Root bark | Rice                  | [47] |
| Austinolide (82)                                                      | C <sub>22</sub> H <sub>26</sub> O <sub>9</sub>                | 434.1577 | <i>P. brasilianum</i>       | <i>M. azedarach</i>    | Root bark | Rice                  | [47] |
| <b>Polyketide</b>                                                     |                                                               |          |                             |                        |           |                       |      |
| Aurasperone A (83)                                                    | C <sub>32</sub> H <sub>26</sub> O <sub>10</sub>               | 570.1526 | <i>A. aculeatus</i> Lizuka  | <i>M. azedarach</i>    |           | Parboiled Rice        | [48] |
| Fonsecinone A (84)                                                    | C <sub>32</sub> H <sub>26</sub> O <sub>10</sub>               | 570.1526 | <i>A. aculeatus</i> Lizuka  | <i>M. azedarach</i>    |           | Parboiled Rice        | [48] |
| Dianhydro-aurasperone C (85)                                          | C <sub>31</sub> H <sub>24</sub> O <sub>10</sub>               | 556.1369 | <i>Aspergillus</i> sp. KJ-9 | <i>M. azedarach</i>    | Stem Bark |                       | [44] |
| Isoaurasperone A (86)                                                 | C <sub>32</sub> H <sub>26</sub> O <sub>10</sub>               | 570.1526 | <i>Aspergillus</i> sp. KJ-9 | <i>M. azedarach</i>    | Stem Bark |                       | [44] |
| Fonsecinone A (87)                                                    | C <sub>31</sub> H <sub>24</sub> O <sub>10</sub>               | 556.1369 | <i>Aspergillus</i> sp. KJ-9 | <i>M. azedarach</i>    | Stem Bark |                       | [44] |
| Asperpyrone A (88)                                                    | C <sub>31</sub> H <sub>24</sub> O <sub>10</sub>               | 556.1369 | <i>Aspergillus</i> sp. KJ-9 | <i>M. azedarach</i>    | Stem Bark |                       | [44] |
| Rubrofusarin B (89)                                                   | C <sub>16</sub> H <sub>14</sub> O <sub>5</sub>                | 286.0841 | <i>Aspergillus</i> sp. KJ-9 | <i>M. azedarach</i>    | Stem Bark |                       | [44] |
| Stemphyperlenol (90)                                                  | C <sub>20</sub> H <sub>16</sub> O <sub>6</sub>                | 392.0947 | <i>B. dothidea</i> KJ-1     | <i>M. azedarach</i> L. | Stem      | Rice                  | [34] |
| Phomopsol A (91)                                                      | C <sub>20</sub> H <sub>19</sub> NO <sub>4</sub>               | 337.1314 | <i>Phomopsis</i> sp. xy21   | <i>X. granatum</i>     | Leaves    |                       | [49] |
| Phomopsol B (92)                                                      | C <sub>16</sub> H <sub>18</sub> O <sub>5</sub>                | 290.1154 | <i>Phomopsis</i> sp. xy21   | <i>X. granatum</i>     | Leaves    |                       | [49] |
| 3-(2,6-dihydroxyphenyl)-4-hydroxy-6methylisobenzofuran-1(3H)-one (93) | C <sub>15</sub> H <sub>12</sub> O <sub>5</sub>                | 272.0685 | <i>Phomopsis</i> sp. xy21   | <i>X. granatum</i>     | Leaves    |                       | [49] |
| Eucalactam B (94)                                                     | C <sub>24</sub> H <sub>31</sub> N <sub>3</sub> O <sub>8</sub> | 499.2894 | <i>D. eucalyptorum</i> KY-9 | <i>M. azedarach</i>    | Leaves    | Rice                  | [50] |
| Citrinin (95)                                                         | C <sub>13</sub> H <sub>14</sub> O <sub>5</sub>                | 250.0841 | <i>P. janthinellum</i>      | <i>M. azedarach</i>    | Fruit     | White corn            | [51] |
| <b>Lactone</b>                                                        |                                                               |          |                             |                        |           |                       |      |
| 8 $\alpha$ -acetoxy-5 $\alpha$ -hydroxy-7-oxodecan-10-olide (96)      | C <sub>12</sub> H <sub>18</sub> O <sub>6</sub>                | 258.1103 | <i>Phomopsis</i> sp.        | <i>A. indica</i>       | Stem      | PDB                   | [26] |
| 7 $\alpha$ ,8 $\alpha$ -dihydroxy-3,5-decadien-10-olide (97)          | C <sub>10</sub> H <sub>14</sub> O <sub>4</sub>                | 198.0892 | <i>Phomopsis</i> sp.        | <i>A. indica</i>       | Stem      | PDB                   | [26] |

|                                                                             |                                                 |          |                                |                           |        |                                                              |      |
|-----------------------------------------------------------------------------|-------------------------------------------------|----------|--------------------------------|---------------------------|--------|--------------------------------------------------------------|------|
| 7 $\alpha$ -acetoxymultiplolide A ( <b>98</b> )                             | C <sub>12</sub> H <sub>16</sub> O <sub>6</sub>  | 257.1032 | <i>Phomopsis</i> sp.           | <i>A. indica</i>          | Stem   | PDB                                                          | [26] |
| 8 $\alpha$ -acetoxymultiplolide A ( <b>99</b> )                             | C <sub>12</sub> H <sub>16</sub> O <sub>6</sub>  | 257.1021 | <i>Phomopsis</i> sp.           | <i>A. indica</i>          | Stem   | PDB                                                          | [26] |
| Multiplolide A ( <b>100</b> )                                               | C <sub>10</sub> H <sub>14</sub> O <sub>5</sub>  | 214.0841 | <i>Phomopsis</i> sp.           | <i>A. indica</i>          | Stem   | PDB                                                          | [26] |
| Nigrosporalactone ( <b>101</b> )                                            | C <sub>8</sub> H <sub>12</sub> O <sub>3</sub>   | 156.0786 | <i>Nigrospora</i> sp. YB-141   | <i>A. indica</i> A. Juss. | Stem   | PDB                                                          | [52] |
| Phomalactone ( <b>102</b> )                                                 | C <sub>8</sub> H <sub>10</sub> O <sub>3</sub>   | 154.0630 | <i>Nigrospora</i> sp. YB-141   | <i>A. indica</i> A. Juss. | Stem   | PDB                                                          | [52] |
| ( <i>R</i> )-striatisporolide A ( <b>103</b> )                              | C <sub>11</sub> H <sub>16</sub> O <sub>4</sub>  | 212.1049 | <i>Eupenicillium</i> sp. HJ002 | <i>X. granatum</i>        |        | Potato Liquid Medium (33g sea salt in 1L of potato infusion) | [22] |
| <b>Pyrone</b>                                                               |                                                 |          |                                |                           |        |                                                              |      |
| Solanapyrone N ( <b>104</b> )                                               | C <sub>18</sub> H <sub>23</sub> NO <sub>4</sub> | 317.1627 | <i>Nigrospora</i> sp. YB-141   | <i>A. indica</i> A. Juss. | Stem   | PDB                                                          | [52] |
| Solanapyrone O ( <b>105</b> )                                               | C <sub>19</sub> H <sub>25</sub> NO <sub>3</sub> | 315.1834 | <i>Nigrospora</i> sp. YB-141   | <i>A. indica</i> A. Juss. | Stem   | PDB                                                          | [52] |
| Solanapyrone C ( <b>106</b> )                                               | C <sub>19</sub> H <sub>25</sub> NO <sub>4</sub> | 331.1784 | <i>Nigrospora</i> sp. YB-141   | <i>A. indica</i> A. Juss. | Stem   | PDB                                                          | [52] |
| Astropyrone ( <b>107</b> )                                                  | C <sub>13</sub> H <sub>18</sub> O <sub>5</sub>  | 254.1154 | <i>Xylaria</i> sp. HNWSW-2     | <i>X. granatum</i>        | Stem   | Rice                                                         | [41] |
| Xylaropyrone B ( <b>108</b> )                                               | C <sub>12</sub> H <sub>18</sub> O <sub>4</sub>  | 226.1205 | <i>Xylaria</i> sp. HNWSW-2     | <i>X. granatum</i>        | Stem   | Rice                                                         | [41] |
| Xylaropyrone C ( <b>109</b> )                                               | C <sub>12</sub> H <sub>18</sub> O <sub>4</sub>  | 226.1205 | <i>Xylaria</i> sp. HNWSW-2     | <i>X. granatum</i>        | Stem   | Rice                                                         | [41] |
| <b>Quinone</b>                                                              |                                                 |          |                                |                           |        |                                                              |      |
| Javanicin ( <b>110</b> )                                                    | C <sub>15</sub> H <sub>14</sub> O <sub>6</sub>  | 290.0790 | <i>Chloridium</i> sp.          | <i>A. indica</i>          | Root   | PDB                                                          | [53] |
| <b>Anthraquinone</b>                                                        |                                                 |          |                                |                           |        |                                                              |      |
| Emodin (1,6,8-trihydroxy-3-methylanthraquinone) ( <b>111</b> )              | C <sub>15</sub> H <sub>10</sub> O <sub>5</sub>  | 270.0528 | <i>P. janthinellum</i>         | <i>M. azedarach</i>       | Fruit  | White corn                                                   | [51] |
| Citreorosein (1,6,8-trihydroxy-3-hydroxymethylanthraquinone) ( <b>112</b> ) | C <sub>15</sub> H <sub>10</sub> O <sub>6</sub>  | 286.0477 | <i>P. janthinellum</i>         | <i>M. azedarach</i>       | Fruit  | White corn                                                   | [51] |
| Janthinone ( <b>113</b> )                                                   | C <sub>16</sub> H <sub>12</sub> O <sub>5</sub>  | 284.0685 | <i>P. janthinellum</i>         | <i>M. azedarach</i>       | Fruit  | White corn                                                   | [51] |
| Arugosin O ( <b>114</b> )                                                   | C <sub>26</sub> H <sub>30</sub> O <sub>5</sub>  | 422.2093 | <i>Xylariaceae</i> sp.         | <i>L. domesticum</i>      | Leaves | Rice                                                         | [54] |
| Arugosin P ( <b>115</b> )                                                   | C <sub>33</sub> H <sub>42</sub> O <sub>8</sub>  | 566.2880 | <i>Xylariaceae</i> sp.         | <i>L. domesticum</i>      | Leaves | Rice                                                         | [54] |
| Arugosin Q ( <b>116</b> )                                                   | C <sub>32</sub> H <sub>42</sub> O <sub>7</sub>  | 538.2931 | <i>Xylariaceae</i> sp.         | <i>L. domesticum</i>      | Leaves | Rice                                                         | [54] |
| Arugosin K ( <b>117</b> )                                                   | C <sub>22</sub> H <sub>24</sub> O <sub>5</sub>  | 368.1624 | <i>Xylariaceae</i> sp.         | <i>L. domesticum</i>      | Leaves | Rice                                                         | [54] |
| Arugosin A ( <b>118</b> )                                                   | C <sub>25</sub> H <sub>28</sub> O <sub>6</sub>  | 424.1886 | <i>Xylariaceae</i> sp.         | <i>L. domesticum</i>      | Leaves | Rice                                                         | [54] |
| Arugosin B ( <b>119</b> )                                                   | C <sub>25</sub> H <sub>28</sub> O <sub>6</sub>  | 424.1886 | <i>Xylariaceae</i> sp.         | <i>L. domesticum</i>      | Leaves | Rice                                                         | [54] |

|                                                                                      |                                                |          |                              |                      |        |                                                                     |      |
|--------------------------------------------------------------------------------------|------------------------------------------------|----------|------------------------------|----------------------|--------|---------------------------------------------------------------------|------|
| Arugosin N (120)                                                                     | C <sub>20</sub> H <sub>20</sub> O <sub>5</sub> | 340.1311 | Xylariaceae sp.              | <i>L. domesticum</i> | Leaves | Rice                                                                | [54] |
| 1,6,10-trihydroxy-8-methyl-2-(3-methyl-2-butenyl)-dibenz[b,e]oxepin-11(6H)-one (121) | C <sub>20</sub> H <sub>20</sub> O <sub>5</sub> | 340.1311 | Xylariaceae sp.              | <i>L. domesticum</i> | Leaves | Rice                                                                | [54] |
| Arugosin L (122)                                                                     | C <sub>22</sub> H <sub>24</sub> O <sub>5</sub> | 368.1624 | Xylariaceae sp.              | <i>L. domesticum</i> | Leaves | Rice                                                                | [54] |
| Arugosin M (123)                                                                     | C <sub>21</sub> H <sub>22</sub> O <sub>5</sub> | 354.1467 | Xylariaceae sp.              | <i>L. domesticum</i> | Leaves | Rice                                                                | [54] |
| Arugosin F (124)                                                                     | C <sub>15</sub> H <sub>12</sub> O <sub>5</sub> | 272.0685 | Xylariaceae sp.              | <i>L. domesticum</i> | Leaves | Rice                                                                | [54] |
| Arugosin G (125)                                                                     | C <sub>30</sub> H <sub>36</sub> O <sub>6</sub> | 492.2512 | Xylariaceae sp.              | <i>L. domesticum</i> | Leaves | Rice                                                                | [54] |
| <b>Xanthone</b>                                                                      |                                                |          |                              |                      |        |                                                                     |      |
| Phomoxanthone F (126)                                                                | C <sub>14</sub> H <sub>12</sub> O <sub>6</sub> | 276.0634 | <i>Phomopsis</i> sp. xy21    | <i>X. granatum</i>   | Leaves | Rice + Sea Salt                                                     | [55] |
| Phomoxanthone G (127)                                                                | C <sub>15</sub> H <sub>16</sub> O <sub>7</sub> | 308.0896 | <i>Phomopsis</i> sp. xy21    | <i>X. granatum</i>   | Leaves | Rice + Sea Salt                                                     | [55] |
| Phomoxanthone H (128)                                                                | C <sub>15</sub> H <sub>16</sub> O <sub>7</sub> | 308.0896 | <i>Phomopsis</i> sp. xy21    | <i>X. granatum</i>   | Leaves | Rice + Sea Salt                                                     | [55] |
| Phomoxanthone I (129)                                                                | C <sub>15</sub> H <sub>16</sub> O <sub>5</sub> | 276.0998 | <i>Phomopsis</i> sp. xy21    | <i>X. granatum</i>   | Leaves | Rice + Sea Salt                                                     | [55] |
| Phomoxanthone J (130)                                                                | C <sub>15</sub> H <sub>12</sub> O <sub>6</sub> | 288.0634 | <i>Phomopsis</i> sp. xy21    | <i>X. granatum</i>   | Leaves | Rice + Sea Salt                                                     | [55] |
| Phomoxanthone K (131)                                                                | C <sub>15</sub> H <sub>10</sub> O <sub>7</sub> | 302.0427 | <i>Phomopsis</i> sp. xy21    | <i>X. granatum</i>   | Leaves | Rice + Sea Salt                                                     | [55] |
| Leptosphaerin E (132)                                                                | C <sub>15</sub> H <sub>12</sub> O <sub>5</sub> | 272.0685 | <i>Phomopsis</i> sp. xy21    | <i>X. granatum</i>   | Leaves | Rice + Sea Salt                                                     | [55] |
| Mono-dictyoxanthone (8-hydroxy-3-methyl-9-oxo-9H-xanthene-1-carboxylic acid) (133)   | C <sub>15</sub> H <sub>10</sub> O <sub>5</sub> | 270.0528 | <i>Phomopsis</i> sp. xy21    | <i>X. granatum</i>   | Leaves | Rice + Sea Salt                                                     | [55] |
| 2,2',6'-trihydroxy-4-methyl-6-methoxy-acyl-diphenylmethanone (134)                   | C <sub>16</sub> H <sub>14</sub> O <sub>6</sub> | 302.0790 | <i>Phomopsis</i> sp. xy21    | <i>X. granatum</i>   | Leaves | Rice + Sea Salt                                                     | [55] |
| <b>Isocoumarin</b>                                                                   |                                                |          |                              |                      |        |                                                                     |      |
| Penicimarin L (135)                                                                  | C <sub>13</sub> H <sub>14</sub> O <sub>6</sub> | 266.0790 | <i>Penicillium</i> sp. MGP11 | <i>X. granatum</i>   | Root   | 70g rice with 100 mL seawater (33g sea salt in 1 L distilled water) | [56] |
| Penicimarin M (136)                                                                  | C <sub>15</sub> H <sub>18</sub> O <sub>5</sub> | 278.1154 | <i>Penicillium</i> sp. MGP11 | <i>X. granatum</i>   | Root   | 70g rice with 100 mL seawater (33g sea salt in 1 L distilled water) | [56] |
| Peniisocoumarin E (137)                                                              | C <sub>14</sub> H <sub>16</sub> O <sub>6</sub> | 280.0947 | <i>Penicillium</i> sp. MGP11 | <i>X. granatum</i>   | Root   | 70g rice with 100 mL seawater (33g sea salt in 1 L distilled water) | [56] |
| Apergilumarin A (138)                                                                | C <sub>14</sub> H <sub>16</sub> O <sub>4</sub> | 248.1049 | <i>Penicillium</i> sp. MGP11 | <i>X. granatum</i>   | Root   | 70g rice with 100 mL seawater (33g sea salt in 1 L distilled water) | [56] |



|                                                                       |                                                  |          |                              |                     |             |                                                                     |      |
|-----------------------------------------------------------------------|--------------------------------------------------|----------|------------------------------|---------------------|-------------|---------------------------------------------------------------------|------|
| Penicimarin I ( <b>139</b> )                                          | C <sub>14</sub> H <sub>16</sub> O <sub>5</sub>   | 264.0998 | <i>Penicillium</i> sp. MGP11 | <i>X. granatum</i>  | Root        | 70g rice with 100 mL seawater (33g sea salt in 1 L distilled water) | [56] |
| Peniisocoumarin F ( <b>140</b> )                                      | C <sub>14</sub> H <sub>18</sub> O <sub>5</sub>   | 266,1154 | <i>Penicillium</i> sp. MGP11 | <i>X. granatum</i>  | Root        | 70g rice with 100 mL seawater (33g sea salt in 1 L distilled water) | [56] |
| Penicilloxalone B ( <b>141</b> )                                      | C <sub>14</sub> H <sub>16</sub> O <sub>5</sub>   | 264.0998 | <i>Penicillium</i> sp. MGP11 | <i>X. granatum</i>  | Root        | 70g rice with 100 mL seawater (33g sea salt in 1 L distilled water) | [56] |
| Penicimarin G ( <b>142</b> )                                          | C <sub>15</sub> H <sub>20</sub> O <sub>5</sub>   | 280.1311 | <i>Penicillium</i> sp. MGP11 | <i>X. granatum</i>  | Root        | 70g rice with 100 mL seawater (33g sea salt in 1 L distilled water) | [56] |
| Penicimarin H ( <b>143</b> )                                          | C <sub>15</sub> H <sub>18</sub> O <sub>5</sub>   | 278.1154 | <i>Penicillium</i> sp. MGP11 | <i>X. granatum</i>  | Root        | 70g rice with 100 mL seawater (33g sea salt in 1 L distilled water) | [56] |
| Fusariumin ( <b>144</b> )                                             | C <sub>18</sub> H <sub>22</sub> O <sub>5</sub>   | 318.1467 | <i>Fusarium</i> sp. LN-10    | <i>M. azedarach</i> | Leaves      | PDB                                                                 | [57] |
| <b>Resorcylic Acid</b>                                                |                                                  |          |                              |                     |             |                                                                     |      |
| Aigialomycin D ( <b>145</b> )                                         | C <sub>18</sub> H <sub>22</sub> O <sub>6</sub>   | 334.1416 | <i>Fusarium</i> sp. LN-10    | <i>M. azedarach</i> | Leaves      | PDB                                                                 | [57] |
| Pochonin N ( <b>146</b> )                                             | C <sub>18</sub> H <sub>27</sub> ClO <sub>7</sub> | 384.0967 | <i>Fusarium</i> sp. LN-10    | <i>M. azedarach</i> | Leaves      | PDB                                                                 | [57] |
| Zearalenone ( <b>147</b> )                                            | C <sub>18</sub> H <sub>22</sub> O <sub>5</sub>   | 318.1467 | <i>Fusarium</i> sp. LN-10    | <i>M. azedarach</i> | Leaves      | PDB                                                                 | [57] |
| (15S)-de-O-methylasiodiplodin ( <b>148</b> )                          | C <sub>16</sub> H <sub>22</sub> O <sub>4</sub>   | 278.1518 | <i>L. theobromae</i> GC-22   | <i>X. granatum</i>  | Dead Branch | Unpolished Rice                                                     | [58] |
| (13S,15S)-13-hydroxy-de-O-methylasiodiplodin ( <b>149</b> )           | C <sub>16</sub> H <sub>22</sub> O <sub>5</sub>   | 294.1467 | <i>L. theobromae</i> GC-22   | <i>X. granatum</i>  | Dead Branch | Unpolished Rice                                                     | [58] |
| (14S,15S)-14-hydroxy-de-O-methylasiodiplodin ( <b>150</b> )           | C <sub>16</sub> H <sub>22</sub> O <sub>5</sub>   | 294.1467 | <i>L. theobromae</i> GC-22   | <i>X. granatum</i>  | Dead Branch | Unpolished Rice                                                     | [58] |
| (13R,14S,15S)-13,14-dihydroxy-de-O-methylasiodiplodin ( <b>151</b> )  | C <sub>16</sub> H <sub>22</sub> O <sub>6</sub>   | 310.1416 | <i>L. theobromae</i> GC-22   | <i>X. granatum</i>  | Dead Branch | Unpolished Rice                                                     | [58] |
| ethyl (S)-2,4-dihydroxy-6-(8-hydroxynonyl)benzoate ( <b>152</b> )     | C <sub>18</sub> H <sub>28</sub> O <sub>5</sub>   | 324.1937 | <i>L. theobromae</i> GC-22   | <i>X. granatum</i>  | Dead Branch | Unpolished Rice                                                     | [58] |
| ethyl 2,4-dihydroxy-6-(8-hydroxyheptyl) benzoate ( <b>153</b> )       | C <sub>16</sub> H <sub>24</sub> O <sub>5</sub>   | 296.1624 | <i>L. theobromae</i> GC-22   | <i>X. granatum</i>  | Dead Branch | Unpolished Rice                                                     | [58] |
| ethyl 2,4-dihydroxy-6-(4-methoxycarbonylbutyl)benzoate ( <b>154</b> ) | C <sub>15</sub> H <sub>20</sub> O <sub>6</sub>   | 296.1260 | <i>L. theobromae</i> GC-22   | <i>X. granatum</i>  | Dead Branch | Unpolished Rice                                                     | [58] |

|                                                                |                                                               |          |                            |                        |             |                  |      |
|----------------------------------------------------------------|---------------------------------------------------------------|----------|----------------------------|------------------------|-------------|------------------|------|
| 3-(2-ethoxycarbonyl-3,5-dihydroxyphen- yl)propionic acid (155) | C <sub>12</sub> H <sub>14</sub> O <sub>6</sub>                | 254.0790 | <i>L. theobromae</i> GC-22 | <i>X. granatum</i>     | Dead Branch | Unpolished Rice  | [58] |
| (S)-2,4-dihydroxy-6-(8-hydroxynonyl)benzoate (156)             | C <sub>20</sub> H <sub>32</sub> O <sub>5</sub>                | 352.2250 | <i>L. theobromae</i> GC-22 | <i>X. granatum</i>     | Dead Branch | Unpolished Rice  | [58] |
| ethyl 2,4-dihydroxy-6-(8-oxononyl)benzoate (157)               | C <sub>18</sub> H <sub>26</sub> O <sub>5</sub>                | 322.1780 | <i>L. theobromae</i> GC-22 | <i>X. granatum</i>     | Dead Branch | Unpolished Rice  | [58] |
| <b>Cytochalasans</b>                                           |                                                               |          |                            |                        |             |                  |      |
| Cytochalasin Z <sub>27</sub> (158)                             | C <sub>28</sub> H <sub>33</sub> NO <sub>6</sub>               | 479.2308 | <i>Xylaria</i> sp. XC-16   | <i>T. sinensis</i>     | Leaves      | Rice             | [24] |
| Cytochalasin Z <sub>28</sub> (159)                             | C <sub>28</sub> H <sub>33</sub> NO <sub>6</sub>               | 479.2308 | <i>Xylaria</i> sp. XC-16   | <i>T. sinensis</i>     | Leaves      | Rice             | [24] |
| Seco-cytochalasin E (160)                                      | C <sub>29</sub> H <sub>37</sub> NO <sub>8</sub>               | 527.2519 | <i>Xylaria</i> sp. XC-16   | <i>T. sinensis</i>     | Leaves      | Rice             | [24] |
| Cytochalasin Z <sub>18</sub> (161)                             | C <sub>32</sub> H <sub>45</sub> NO <sub>8</sub>               | 571.3145 | <i>Xylaria</i> sp. XC-16   | <i>T. sinensis</i>     | Leaves      | Rice             | [24] |
| Cytochalasin E (162)                                           | C <sub>28</sub> H <sub>33</sub> NO <sub>7</sub>               | 495.2257 | <i>Xylaria</i> sp. XC-16   | <i>T. sinensis</i>     | Leaves      | Rice             | [24] |
|                                                                |                                                               |          | <i>Xylaria</i> sp. XC-16   | <i>T. sinensis</i>     | Leaves      | PD liquid medium | [42] |
| Chaetoglobosin C (163)                                         | C <sub>32</sub> H <sub>36</sub> N <sub>2</sub> O <sub>5</sub> | 528.2624 | <i>B. dothidea</i> KJ-1    | <i>M. azedarach</i> L. | Stem        | Rice             | [34] |
| Chaetoglobosin F (164)                                         | C <sub>32</sub> H <sub>38</sub> N <sub>2</sub> O <sub>5</sub> | 530.2781 | <i>B. dothidea</i> KJ-1    | <i>M. azedarach</i> L. | Stem        | Rice             | [34] |
| Phomopsichalasin D (165)                                       | C <sub>30</sub> H <sub>37</sub> NO <sub>6</sub>               | 509.2414 | <i>Phomopsis</i> sp. xy22  | <i>X. granatum</i>     | Leaves      | Rice             | [59] |
| Phomopsichalasin E (166)                                       | C <sub>30</sub> H <sub>37</sub> NO <sub>6</sub>               | 507.2621 | <i>Phomopsis</i> sp. xy22  | <i>X. granatum</i>     | Leaves      | Rice             | [59] |
| Phomopsichalasin F (167)                                       | C <sub>28</sub> H <sub>37</sub> NO <sub>3</sub>               | 435.2773 | <i>Phomopsis</i> sp. xy21  | <i>X. granatum</i>     | Leaves      | Rice             | [59] |
| Phomopsichalasin G (168)                                       | C <sub>28</sub> H <sub>37</sub> NO <sub>4</sub>               | 451.2723 | <i>Phomopsis</i> sp. xy21  | <i>X. granatum</i>     | Leaves      | Rice             | [59] |
| 4'-hydroxy-deacetyl-18-deoxycytochalasin H (169)               | C <sub>28</sub> H <sub>37</sub> NO <sub>4</sub>               | 451.2723 | <i>Phomopsis</i> sp. xy21  | <i>X. granatum</i>     | Leaves      | Rice             | [59] |
| deacetyl-18-deoxycytochalasin H (170)                          | C <sub>28</sub> H <sub>37</sub> NO <sub>3</sub>               | 435.2773 | <i>Phomopsis</i> sp. xy21  | <i>X. granatum</i>     | Leaves      | Rice             | [59] |
| 18-deoxycytochalasin H (171)                                   | C <sub>30</sub> H <sub>39</sub> NO <sub>4</sub>               | 477.2879 | <i>Phomopsis</i> sp. xy21  | <i>X. granatum</i>     | Leaves      | Rice             | [59] |
| cytochalasin H (172)                                           | C <sub>30</sub> H <sub>39</sub> NO <sub>5</sub>               | 493.2828 | <i>Phomopsis</i> sp. xy22  | <i>X. granatum</i>     | Leaves      | Rice             | [59] |
| deacetylcytochalasin H (173)                                   | C <sub>28</sub> H <sub>37</sub> NO <sub>4</sub>               | 451.2723 | <i>Phomopsis</i> sp. xy22  | <i>X. granatum</i>     | Leaves      | Rice             | [59] |
| epoxycytochalasin H (174)                                      | C <sub>30</sub> H <sub>39</sub> NO <sub>5</sub>               | 493.2828 | <i>Phomopsis</i> sp. xy22  | <i>X. granatum</i>     | Leaves      | Rice             | [59] |
| Cytochalasin D (175)                                           | C <sub>30</sub> H <sub>37</sub> NO <sub>6</sub>               | 507.2621 | <i>C. gloeosporioides</i>  | <i>T. monadelph</i>    | Stem bark   | Rice             | [27] |
| Xylarisin B (176)                                              | C <sub>23</sub> H <sub>35</sub> NO <sub>5</sub>               | 405.2515 | <i>Xylaria</i> sp. HNWSW-2 | <i>X. granatum</i>     | Stem        | Rice             | [41] |
| Epoxycytochalasin Z <sub>17</sub> (177)                        | C <sub>28</sub> H <sub>33</sub> NO <sub>6</sub>               | 479.2308 | <i>Xylaria</i> sp. XC-16   | <i>T. sinensis</i>     | Leaves      | PD liquid medium | [42] |
| Epoxycytochalasin Z <sub>8</sub> (178)                         | C <sub>28</sub> H <sub>35</sub> NO <sub>6</sub>               | 481.2464 | <i>Xylaria</i> sp. XC-16   | <i>T. sinensis</i>     | Leaves      | PD liquid medium | [42] |
| Epoxysellichalasin (179)                                       | C <sub>28</sub> H <sub>33</sub> NO <sub>6</sub>               | 479.2308 | <i>Xylaria</i> sp. XC-16   | <i>T. sinensis</i>     | Leaves      | PD liquid medium | [42] |
| 10-phenyl-[12]-cytochalasin Z <sub>16</sub> (180)              | C <sub>28</sub> H <sub>33</sub> NO <sub>5</sub>               | 463.2359 | <i>Xylaria</i> sp. XC-16   | <i>T. sinensis</i>     | Leaves      | PD liquid medium | [42] |
| 10-phenyl-[12]-cytochalasin Z <sub>17</sub> (181)              | C <sub>28</sub> H <sub>33</sub> NO <sub>5</sub>               | 463.2359 | <i>Xylaria</i> sp. XC-16   | <i>T. sinensis</i>     | Leaves      | PD liquid medium | [42] |
| Cytochalasin K (182)                                           | C <sub>28</sub> H <sub>33</sub> NO <sub>7</sub>               | 495.2257 | <i>Xylaria</i> sp. XC-16   | <i>T. sinensis</i>     | Leaves      | PD liquid medium | [42] |

| Aromatics                                                        |                                                  |          |                                |                        |           |                                                              |      |
|------------------------------------------------------------------|--------------------------------------------------|----------|--------------------------------|------------------------|-----------|--------------------------------------------------------------|------|
| 4,8-dihydroxy-1-tetralone (183)                                  | C <sub>10</sub> H <sub>10</sub> O <sub>3</sub>   | 178.0630 | <i>A. fumigatus</i> LN-4       | <i>M. azedarach</i>    | Stem bark | PD liquid medium                                             | [32] |
| trans-3,4-dihydro-3,4,8-trihydroxynaphtalen-1(2H)-one (184)      | C <sub>10</sub> H <sub>10</sub> O <sub>4</sub>   | 194.0579 | <i>A. fumigatus</i> LN-4       | <i>M. azedarach</i>    | Stem bark | PD liquid medium                                             | [32] |
| cis-3,4-dihydro-3,4,8-trihydroxynaphtalen-1(2H)-one (185)        | C <sub>10</sub> H <sub>10</sub> O <sub>4</sub>   | 194.0579 | <i>A. fumigatus</i> LN-4       | <i>M. azedarach</i>    | Stem bark | PD liquid medium                                             | [32] |
| Altenuene (186)                                                  | C <sub>15</sub> H <sub>16</sub> O <sub>6</sub>   | 292.0947 | <i>B. dothidea</i> KJ-1        | <i>M. azedarach</i> L. | Stem      | Rice                                                         | [34] |
| Altenusin (187)                                                  | C <sub>15</sub> H <sub>14</sub> O <sub>6</sub>   | 290.0790 | <i>B. dothidea</i> KJ-1        | <i>M. azedarach</i> L. | Stem      | Rice                                                         | [34] |
| Djalonsone (188)                                                 | C <sub>14</sub> H <sub>14</sub> O <sub>4</sub>   | 246.0892 | <i>B. dothidea</i> KJ-1        | <i>M. azedarach</i> L. | Stem      | Rice                                                         | [34] |
| Alternariol (189)                                                | C <sub>15</sub> H <sub>12</sub> O <sub>5</sub>   | 272.0685 | <i>B. dothidea</i> KJ-1        | <i>M. azedarach</i> L. | Stem      | Rice                                                         | [34] |
| 5'-methoxy-6-methylbiphenyl-3,4,3'-triol (190)                   | C <sub>14</sub> H <sub>10</sub> O <sub>5</sub>   | 258.0528 | <i>B. dothidea</i> KJ-1        | <i>M. azedarach</i> L. | Stem      | Rice                                                         | [34] |
| 7-hydroxy-1-isochromanone 3587 (191)                             | C <sub>9</sub> H <sub>10</sub> O <sub>3</sub>    | 166.0630 | <i>B. dothidea</i> KJ-1        | <i>M. azedarach</i> L. | Stem      | Rice                                                         | [34] |
| 5-(hydroxymethyl)-1H-pyrrole-2-carbaldehyde (192)                | C <sub>6</sub> H <sub>7</sub> NO <sub>2</sub>    | 125.0477 | <i>B. dothidea</i> KJ-1        | <i>M. azedarach</i> L. | Stem      | Rice                                                         | [34] |
| 5-hydroxymethylfurfural (193)                                    | C <sub>6</sub> H <sub>6</sub> O <sub>3</sub>     | 126.0317 | <i>B. dothidea</i> KJ-1        | <i>M. azedarach</i> L. | Stem      | Rice                                                         | [34] |
| 3-chloro-5-hydroxy-4-methoxyphenylacetic acid methyl ester (194) | C <sub>10</sub> H <sub>11</sub> ClO <sub>4</sub> | 230.0346 | <i>Eupenicillium</i> sp. HJ002 | <i>X. granatum</i>     |           | Potato Liquid Medium (33g sea salt in 1L of potato infusion) | [22] |
| 4-hydroxyphenylacetate (195)                                     | C <sub>9</sub> H <sub>10</sub> O <sub>3</sub>    | 166.0630 | <i>Eupenicillium</i> sp. HJ002 | <i>X. granatum</i>     |           | Potato Liquid Medium (33g sea salt in 1L of potato infusion) | [22] |
| Cytosporone B (196)                                              | C <sub>18</sub> H <sub>26</sub> O <sub>5</sub>   | 322.1780 | <i>Eupenicillium</i> sp. HJ002 | <i>X. granatum</i>     |           | Potato Liquid Medium (33g sea salt in 1L of potato infusion) | [22] |
| Eugenitol (197)                                                  | C <sub>12</sub> H <sub>12</sub> O <sub>4</sub>   | 220.0736 | <i>D. eucalyptorum</i> KY-9    | <i>M. azedarach</i>    | Leaves    | Rice                                                         | [50] |
| Cytosporone C (198)                                              | C <sub>16</sub> H <sub>22</sub> O <sub>2</sub>   | 246.1620 | <i>D. eucalyptorum</i> KY-9    | <i>M. azedarach</i>    | Leaves    | Rice                                                         | [50] |
| 4-hydroxyphenethyl alcohol (199)                                 | C <sub>8</sub> H <sub>10</sub> O <sub>2</sub>    | 138.0681 | <i>D. eucalyptorum</i> KY-9    | <i>M. azedarach</i>    | Leaves    | Rice                                                         | [50] |

|                                                |                                                               |          |                             |                     |           |                                                              |      |
|------------------------------------------------|---------------------------------------------------------------|----------|-----------------------------|---------------------|-----------|--------------------------------------------------------------|------|
| 1-(4-hydroxyphenyl)ethane-1,2-diol (200)       | C <sub>8</sub> H <sub>10</sub> O <sub>3</sub>                 | 154.0630 | <i>D. eucalyptorum</i> KY-9 | <i>M. azedarach</i> | Leaves    | Rice                                                         | [50] |
| <b>Ester</b>                                   |                                                               |          |                             |                     |           |                                                              |      |
| (R)-butanedioic acid (201)                     | C <sub>12</sub> H <sub>20</sub> O <sub>4</sub>                | 228.1362 | Eupenicillium sp. HJ002     | <i>X. granatum</i>  |           | Potato Liquid Medium (33g sea salt in 1L of potato infusion) | [22] |
| <b>Quinols</b>                                 |                                                               |          |                             |                     |           |                                                              |      |
| Cytosporin D (202)                             | C <sub>19</sub> H <sub>30</sub> O <sub>5</sub>                | 338.2093 | <i>P. theae</i>             | <i>T. longipes</i>  | Leaves    | Rice                                                         | [28] |
| Cytosporin F (203)                             | C <sub>21</sub> H <sub>32</sub> O <sub>6</sub>                | 380.2199 | <i>P. theae</i>             | <i>T. longipes</i>  | Leaves    | Rice                                                         | [28] |
| Cytosporin G (204)                             | C <sub>21</sub> H <sub>32</sub> O <sub>7</sub>                | 396.2148 | <i>P. theae</i>             | <i>T. longipes</i>  | Leaves    | Rice                                                         | [28] |
| Cytosporin H (205)                             | C <sub>21</sub> H <sub>32</sub> O <sub>7</sub>                | 396.2148 | <i>P. theae</i>             | <i>T. longipes</i>  | Leaves    | Rice                                                         | [28] |
| Cytosporin I (206)                             | C <sub>21</sub> H <sub>32</sub> O <sub>7</sub>                | 396.2148 | <i>P. theae</i>             | <i>T. longipes</i>  | Leaves    | Rice                                                         | [28] |
| Cytosporin J (207)                             | C <sub>19</sub> H <sub>30</sub> O <sub>6</sub>                | 354.2042 | <i>P. theae</i>             | <i>T. longipes</i>  | Leaves    | Rice                                                         | [28] |
| Cytosporin K (208)                             | C <sub>19</sub> H <sub>30</sub> O <sub>6</sub>                | 354.2042 | <i>P. theae</i>             | <i>T. longipes</i>  | Leaves    | Rice                                                         | [28] |
| <b>Alkaloids</b>                               |                                                               |          |                             |                     |           |                                                              |      |
| Verruculogen (209)                             | C <sub>27</sub> H <sub>33</sub> N <sub>3</sub> O <sub>7</sub> | 511.2319 | <i>Penicillium</i> sp.      | <i>M. azedarach</i> | Root bark | Rice                                                         | [46] |
|                                                |                                                               |          | <i>A. fumigatus</i> LN-4    | <i>M. azedarach</i> | Stem bark | PD liquid medium                                             | [32] |
|                                                |                                                               |          | <i>P. brasilianum</i>       | <i>M. azedarach</i> | Root bark | Rice                                                         | [60] |
| Brasiliamide A (210)                           | C <sub>24</sub> H <sub>26</sub> N <sub>2</sub> O <sub>6</sub> | 438.1791 | <i>P. brasilianum</i>       | <i>M. azedarach</i> | Root bark | Rice                                                         | [47] |
| Brasiliamide B (211)                           | C <sub>22</sub> H <sub>22</sub> N <sub>2</sub> O <sub>6</sub> | 410.1478 | <i>P. brasilianum</i>       | <i>M. azedarach</i> | Root bark | Rice                                                         | [47] |
| Fumitremorgin C (212)                          | C <sub>22</sub> H <sub>25</sub> N <sub>3</sub> O <sub>3</sub> | 379.1896 | <i>A. fumigatus</i> LN-4    | <i>M. azedarach</i> | Stem bark | PD liquid medium                                             | [32] |
| Fumitremorgin A (213)                          | C <sub>22</sub> H <sub>25</sub> N <sub>3</sub> O <sub>5</sub> | 411.1794 | <i>A. fumigatus</i> LN-4    | <i>M. azedarach</i> | Stem bark | PD liquid medium                                             | [32] |
| Cyclotryprostatin B (214)                      | C <sub>23</sub> H <sub>27</sub> N <sub>3</sub> O <sub>5</sub> | 425.1951 | <i>A. fumigatus</i> LN-4    | <i>M. azedarach</i> | Stem bark | PD liquid medium                                             | [32] |
| Verrulocogen TR-2 (215)                        | C <sub>22</sub> H <sub>27</sub> N <sub>3</sub> O <sub>6</sub> | 429.1900 | <i>A. fumigatus</i> LN-4    | <i>M. azedarach</i> | Stem bark | PD liquid medium                                             | [32] |
| 12β-hydroxyverruculogen TR-2 (216)             | C <sub>22</sub> H <sub>27</sub> N <sub>3</sub> O <sub>6</sub> | 429.1900 | <i>A. fumigatus</i> LN-4    | <i>M. azedarach</i> | Stem bark | PD liquid medium                                             | [32] |
| 12β-hydroxy-13α-methoxyverruculogen TR-2 (217) | C <sub>23</sub> H <sub>29</sub> N <sub>3</sub> O <sub>6</sub> | 443.2056 | <i>A. fumigatus</i> LN-4    | <i>M. azedarach</i> | Stem bark | PD liquid medium                                             | [32] |
| Fumitremorgin B (218)                          | C <sub>27</sub> H <sub>33</sub> N <sub>3</sub> O <sub>5</sub> | 479.2420 | <i>A. fumigatus</i> LN-4    | <i>M. azedarach</i> | Stem bark | PD liquid medium                                             | [32] |
| Tryprostatin A (219)                           | C <sub>22</sub> H <sub>27</sub> N <sub>3</sub> O <sub>3</sub> | 381.2052 | <i>A. fumigatus</i> LN-4    | <i>M. azedarach</i> | Stem bark | PD liquid medium                                             | [32] |
| Cyclo-L-tryptophyl-L-proline (220)             | C <sub>16</sub> H <sub>17</sub> N <sub>3</sub> O <sub>2</sub> | 283.1321 | <i>A. fumigatus</i> LN-4    | <i>M. azedarach</i> | Stem bark | PD liquid medium                                             | [32] |
| Terezine D (221)                               | C <sub>19</sub> H <sub>23</sub> N <sub>3</sub> O <sub>2</sub> | 325.1790 | <i>A. fumigatus</i> LN-4    | <i>M. azedarach</i> | Stem bark | PD liquid medium                                             | [32] |
| Fumiquinazoline F (222)                        | C <sub>21</sub> H <sub>18</sub> N <sub>4</sub> O <sub>2</sub> | 358.1430 | <i>A. fumigatus</i> LN-4    | <i>M. azedarach</i> | Stem bark | PD liquid medium                                             | [32] |
| Fumiquinazoline G (223)                        | C <sub>21</sub> H <sub>18</sub> N <sub>4</sub> O <sub>2</sub> | 358.1430 | <i>A. fumigatus</i> LN-4    | <i>M. azedarach</i> | Stem bark | PD liquid medium                                             | [32] |

|                                                                                                         |                                                                              |          |                                  |                                 |           |                  |      |
|---------------------------------------------------------------------------------------------------------|------------------------------------------------------------------------------|----------|----------------------------------|---------------------------------|-----------|------------------|------|
| Fumiquinazoline D (224)                                                                                 | C <sub>24</sub> H <sub>21</sub> N <sub>5</sub> O <sub>4</sub>                | 443.1594 | <i>A. fumigatus</i> LN-4         | <i>M. azedarach</i>             | Stem bark | PD liquid medium | [32] |
| Fumiquinazoline A (225)                                                                                 | C <sub>24</sub> H <sub>23</sub> N <sub>5</sub> O <sub>4</sub>                | 445.1750 | <i>A. fumigatus</i> LN-4         | <i>M. azedarach</i>             | Stem bark | PD liquid medium | [32] |
| 3-hydroxyfumiquinazoline A (226)                                                                        | C <sub>24</sub> H <sub>23</sub> N <sub>5</sub> O <sub>5</sub>                | 461.1699 | <i>A. fumigatus</i> LN-4         | <i>M. azedarach</i>             | Stem bark | PD liquid medium | [32] |
| 6-methoxyspirotryprostatin B (227)                                                                      | C <sub>22</sub> H <sub>23</sub> N <sub>3</sub> O <sub>4</sub>                | 393.1689 | <i>A. fumigatus</i> LN-4         | <i>M. azedarach</i>             | Stem bark | PD liquid medium | [32] |
| Spiro [5H,10H-dipyrrolo[1,2- $\alpha$ :1',2'-d]pyrazine-2-(3H),2'-[2H]indole]-3',5,10(1'H)-trione (228) | C <sub>22</sub> H <sub>25</sub> N <sub>3</sub> O <sub>6</sub>                | 427.1743 | <i>A. fumigatus</i> LN-4         | <i>M. azedarach</i>             | Stem bark | PD liquid medium | [32] |
| Pseurotin A (229)                                                                                       | C <sub>22</sub> H <sub>25</sub> NO <sub>8</sub>                              | 431.1580 | <i>A. fumigatus</i> LN-4         | <i>M. azedarach</i>             | Stem bark | PD liquid medium | [32] |
| Pseurotin A <sub>1</sub> (230)                                                                          | C <sub>22</sub> H <sub>25</sub> NO <sub>8</sub>                              | 431.1580 | <i>A. fumigatus</i> LN-4         | <i>M. azedarach</i>             | Stem bark | PD liquid medium | [32] |
| Tryptoquivaline O (231)                                                                                 | C <sub>22</sub> H <sub>18</sub> N <sub>4</sub> O <sub>4</sub>                | 402.1328 | <i>A. fumigatus</i> LN-4         | <i>M. azedarach</i>             | Stem bark | PD liquid medium | [32] |
| Fumifaclavine B (232)                                                                                   | C <sub>16</sub> H <sub>20</sub> N <sub>2</sub> O                             | 256.1576 | <i>A. fumigatus</i> LN-4         | <i>M. azedarach</i>             | Stem bark | PD liquid medium | [32] |
| Bisdethiobis(methylthio)gliotoxin (233)                                                                 | C <sub>15</sub> H <sub>20</sub> N <sub>2</sub> O <sub>4</sub> S <sub>2</sub> | 356.0864 | <i>A. fumigatus</i> LN-4         | <i>M. azedarach</i>             | Stem bark | PD liquid medium | [32] |
| Cyclo-(Pro-Gly) (234)                                                                                   | C <sub>7</sub> H <sub>10</sub> N <sub>2</sub> O <sub>2</sub>                 | 154.0742 | <i>A. fumigatus</i> LN-4         | <i>M. azedarach</i>             | Stem bark | PD liquid medium | [32] |
| Cyclo-(Pro-Ala) (235)                                                                                   | C <sub>8</sub> H <sub>12</sub> N <sub>2</sub> O <sub>2</sub>                 | 168.0899 | <i>A. fumigatus</i> LN-4         | <i>M. azedarach</i>             | Stem bark | PD liquid medium | [32] |
| Cyclo-(D-Pro-L-Ala) (236)                                                                               | C <sub>8</sub> H <sub>12</sub> N <sub>2</sub> O <sub>2</sub>                 | 168.0899 | <i>A. fumigatus</i> LN-4         | <i>M. azedarach</i>             | Stem bark | PD liquid medium | [32] |
| Cyclo-(Pro-Ser) (237)                                                                                   | C <sub>9</sub> H <sub>14</sub> N <sub>2</sub> O <sub>3</sub>                 | 198.1004 | <i>A. fumigatus</i> LN-4         | <i>M. azedarach</i>             | Stem bark | PD liquid medium | [32] |
| Cyclo-(Ser-trans-4-OH-Pro) (238)                                                                        | C <sub>9</sub> H <sub>14</sub> N <sub>2</sub> O <sub>4</sub>                 | 214.0954 | <i>A. fumigatus</i> LN-4         | <i>M. azedarach</i>             | Stem bark | PD liquid medium | [32] |
| Cyclo-(Leu-4-OH-Pro) (239)                                                                              | C <sub>12</sub> H <sub>20</sub> N <sub>2</sub> O <sub>3</sub>                | 240.1474 | <i>A. fumigatus</i> LN-4         | <i>M. azedarach</i>             | Stem bark | PD liquid medium | [32] |
| Cyclo-(Ala-trans-4-OH-Pro) (240)                                                                        | C <sub>8</sub> H <sub>12</sub> N <sub>2</sub> O <sub>3</sub>                 | 184.0848 | <i>A. fumigatus</i> LN-4         | <i>M. azedarach</i>             | Stem bark | PD liquid medium | [32] |
| Cyclo-(cis-OH-D-Pro-L-Phe) (241)                                                                        | C <sub>14</sub> H <sub>16</sub> N <sub>2</sub> O <sub>3</sub>                | 260.1161 | <i>A. fumigatus</i> LN-4         | <i>M. azedarach</i>             | Stem bark | PD liquid medium | [32] |
| Cyclo-(Gly-Phe) (242)                                                                                   | C <sub>11</sub> H <sub>12</sub> N <sub>2</sub> O <sub>2</sub>                | 204.0899 | <i>A. fumigatus</i> LN-4         | <i>M. azedarach</i>             | Stem bark | PD liquid medium | [32] |
| Cyclo-(Pro-tans-4-OH-Pro) (243)                                                                         | C <sub>10</sub> H <sub>14</sub> N <sub>2</sub> O <sub>3</sub>                | 210.1004 | <i>A. fumigatus</i> LN-4         | <i>M. azedarach</i>             | Stem bark | PD liquid medium | [32] |
| Cyclo-(Gly-Ala) (244)                                                                                   | C <sub>5</sub> H <sub>8</sub> N <sub>2</sub> O <sub>2</sub>                  | 128.0586 | <i>A. fumigatus</i> LN-4         | <i>M. azedarach</i>             | Stem bark | PD liquid medium | [32] |
| Uracil (245)                                                                                            | C <sub>4</sub> H <sub>4</sub> N <sub>2</sub> O <sub>2</sub>                  | 410.1478 | <i>A. fumigatus</i> LN-4         | <i>M. azedarach</i>             | Stem bark | PD liquid medium | [32] |
| Rohitukine (246)                                                                                        | C <sub>16</sub> H <sub>19</sub> NO <sub>5</sub>                              | 305.1263 | <i>F. proliferatum</i> MTCC 9690 | <i>D. binectariferum</i> Hook.f | Bark      | PDB              | [61] |
|                                                                                                         |                                                                              |          | <i>F. oxysporum</i> MTCC 11383   | <i>D. binectariferum</i> Hook.f | Leaves    | Broth            | [61] |
|                                                                                                         |                                                                              |          | <i>F. solani</i> MTCC 11385      | <i>D. binectariferum</i> Hook.f | Fruit     | Broth            | [61] |
|                                                                                                         |                                                                              |          | <i>F. oxysporum</i> MTCC 11384   | <i>D. binectariferum</i> Hook.f | Bark      | Broth            | [61] |

|                                                                            |                                                               |          |                                                                |                                          |              |                                                                                                                             |      |
|----------------------------------------------------------------------------|---------------------------------------------------------------|----------|----------------------------------------------------------------|------------------------------------------|--------------|-----------------------------------------------------------------------------------------------------------------------------|------|
| Rohitukine N-oxide (247)                                                   | C <sub>16</sub> H <sub>19</sub> NO <sub>5</sub>               | 321.1212 | <i>G. fujikurai</i> MTCC 11382                                 | <i>Amoora rohituka</i>                   | Bark         | Broth                                                                                                                       | [61] |
|                                                                            |                                                               |          | <i>F. oxysporum</i> MTCC 11383                                 | <i>D. binectariferum</i> Hook.f          | Leaves       | Broth                                                                                                                       | [61] |
|                                                                            |                                                               |          | <i>F. solani</i> MTCC 11385                                    | <i>D. binectariferum</i> Hook.f          | Fruit        | Broth                                                                                                                       | [61] |
|                                                                            |                                                               |          | <i>F. oxysporum</i> MTCC 11384                                 | <i>D. binectariferum</i> Hook.f          | Bark         | Broth                                                                                                                       | [61] |
| Flavopiridol (248)                                                         | C <sub>21</sub> H <sub>20</sub> ClNO <sub>5</sub>             | 401.1030 | <i>G. fujikurai</i> MTCC 11382                                 | <i>Amoora rohituka</i>                   | Bark         | Broth                                                                                                                       | [61] |
|                                                                            |                                                               |          | <i>F. oxysporum</i> MTCC 11383                                 | <i>D. binectariferum</i> Hook.f          | Leaves       | Broth                                                                                                                       | [61] |
|                                                                            |                                                               |          | <i>F. solani</i> MTCC 11385                                    | <i>D. binectariferum</i> Hook.f          | Fruit        | Broth                                                                                                                       | [61] |
|                                                                            |                                                               |          | <i>F. oxysporum</i> MTCC 11384                                 | <i>D. binectariferum</i> Hook.f          | Bark         | Broth                                                                                                                       | [61] |
| 2-(furan-2-yl)-6-(2 <i>S</i> ,3 <i>S</i> ,4-trihydroxybutyl)pyrazine (249) | C <sub>12</sub> H <sub>14</sub> N <sub>2</sub> O <sub>4</sub> | 250.0954 | <i>G. fujikurai</i> MTCC 11382<br><i>J. endophytica</i> 161111 | <i>A. rohituka</i><br><i>X. granatum</i> | Bark<br>Root | Broth (glucose 2%, yeast extract 0.5%, peptone 0.5%, KNO <sub>3</sub> 1.5%, CaCO <sub>3</sub> 0.4%, and NaCl 0.4% (pH 7.2)) | [62] |
| 2-(furan-2-yl)-5-(2 <i>S</i> ,3 <i>S</i> ,4-trihydroxybutyl)pyrazine (250) | C <sub>12</sub> H <sub>14</sub> N <sub>2</sub> O <sub>4</sub> | 250.0954 | <i>J. endophytica</i> 161111                                   | <i>X. granatum</i>                       | Root         | Broth (glucose 2%, yeast extract 0.5%, peptone 0.5%, KNO <sub>3</sub> 1.5%, CaCO <sub>3</sub> 0.4%, and NaCl 0.4% (pH 7.2)) | [62] |

|                                                                                                       |                                                               |          |                              |                    |      |                                                                                                                             |      |
|-------------------------------------------------------------------------------------------------------|---------------------------------------------------------------|----------|------------------------------|--------------------|------|-----------------------------------------------------------------------------------------------------------------------------|------|
| (S)-4-isobutyl-3-oxo-3,4-dihydro-1H-pyrrolo[2,1-c][1,4]oxazine-6-carbaldehyde ( <b>251</b> )          | C <sub>13</sub> H <sub>17</sub> NO <sub>3</sub>               | 235.1208 | <i>J. endophytica</i> 161111 | <i>X. granatum</i> | Root | Broth (glucose 2%, yeast extract 0.5%, peptone 0.5%, KNO <sub>3</sub> 1.5%, CaCO <sub>3</sub> 0.4%, and NaCl 0.4% (pH 7.2)) | [62] |
| (S)-4-isopropyl-3-oxo-3,4-dihydro-1H-pyrrolo [2,1-c][1,4]oxazine-6-carbaldehyde ( <b>252</b> )        | C <sub>12</sub> H <sub>15</sub> NO <sub>3</sub>               | 221.1052 | <i>J. endophytica</i> 161111 | <i>X. granatum</i> | Root | Broth (glucose 2%, yeast extract 0.5%, peptone 0.5%, KNO <sub>3</sub> 1.5%, CaCO <sub>3</sub> 0.4%, and NaCl 0.4% (pH 7.2)) | [62] |
| (4S)-4-(2-methylbutyl)-3-oxo-3,4-dihydro-1H-pyrrolo [2,1-c][1,4]oxazine-6-carbaldehyde ( <b>253</b> ) | C <sub>13</sub> H <sub>17</sub> NO <sub>3</sub>               | 235.1208 | <i>J. endophytica</i> 161111 | <i>X. granatum</i> | Root | Broth (glucose 2%, yeast extract 0.5%, peptone 0.5%, KNO <sub>3</sub> 1.5%, CaCO <sub>3</sub> 0.4%, and NaCl 0.4% (pH 7.2)) | [62] |
| (S)-4-benzyl-3-oxo-3,4-dihydro-1H-pyrrolo[2,1-c] [1,4]oxazine-6-carbaldehyde ( <b>254</b> )           | C <sub>16</sub> H <sub>15</sub> NO <sub>3</sub>               | 269.1052 | <i>J. endophytica</i> 161111 | <i>X. granatum</i> | Root | Broth (glucose 2%, yeast extract 0.5%, peptone 0.5%, KNO <sub>3</sub> 1.5%, CaCO <sub>3</sub> 0.4%, and NaCl 0.4% (pH 7.2)) | [62] |
| Flazin ( <b>255</b> )                                                                                 | C <sub>18</sub> H <sub>14</sub> N <sub>2</sub> O <sub>4</sub> | 322.0954 | <i>J. endophytica</i> 161111 | <i>X. granatum</i> | Root | Broth (glucose 2%, yeast extract 0.5%, peptone 0.5%, KNO <sub>3</sub> 1.5%, CaCO <sub>3</sub> 0.4%, and NaCl 0.4% (pH 7.2)) | [62] |
| Perlolryne ( <b>256</b> )                                                                             | C <sub>17</sub> H <sub>14</sub> N <sub>2</sub> O <sub>2</sub> | 278.1055 | <i>J. endophytica</i> 161111 | <i>X. granatum</i> | Root | Broth (glucose 2%, yeast extract 0.5%, peptone 0.5%, KNO <sub>3</sub> 1.5%, CaCO <sub>3</sub> 0.4%, and NaCl 0.4% (pH 7.2)) | [62] |
| 1-hydroxy-β-carboline ( <b>257</b> )                                                                  | C <sub>11</sub> H <sub>8</sub> N <sub>2</sub> O               | 184.0637 | <i>J. endophytica</i> 161111 | <i>X. granatum</i> | Root | Broth (glucose 2%, yeast extract 0.5%, peptone 0.5%, KNO <sub>3</sub> 1.5%, CaCO <sub>3</sub> 0.4%, and NaCl 0.4% (pH 7.2)) | [62] |

|                                                                                                 |                                                                 |          |                                    |                                               |           |                                                                                                                             |      |
|-------------------------------------------------------------------------------------------------|-----------------------------------------------------------------|----------|------------------------------------|-----------------------------------------------|-----------|-----------------------------------------------------------------------------------------------------------------------------|------|
| Lumichrome (258)                                                                                | C <sub>12</sub> H <sub>10</sub> N <sub>4</sub> O <sub>2</sub>   | 242.0804 | <i>J. endophytica</i> 161111       | <i>X. granatum</i>                            | Root      | Broth (glucose 2%, yeast extract 0.5%, peptone 0.5%, KNO <sub>3</sub> 1.5%, CaCO <sub>3</sub> 0.4%, and NaCl 0.4% (pH 7.2)) | [62] |
| 1H-indole-3-carboxaldehyde (259)                                                                | C <sub>9</sub> H <sub>7</sub> NO                                | 145.0528 | <i>J. endophytica</i> 161111       | <i>X. granatum</i>                            | Root      | Broth (glucose 2%, yeast extract 0.5%, peptone 0.5%, KNO <sub>3</sub> 1.5%, CaCO <sub>3</sub> 0.4%, and NaCl 0.4% (pH 7.2)) | [62] |
| [14,15], 2-hydroxy-1-(1H-indol-3-yl) ethenone (260)                                             | C <sub>10</sub> H <sub>9</sub> NO <sub>2</sub>                  | 175.0633 | <i>J. endophytica</i> 161111       | <i>X. granatum</i>                            | Root      | Broth (glucose 2%, yeast extract 0.5%, peptone 0.5%, KNO <sub>3</sub> 1.5%, CaCO <sub>3</sub> 0.4%, and NaCl 0.4% (pH 7.2)) | [62] |
| 5-(methoxymethyl)-1H-pyrrole-2-carbaldehyde (261)                                               | C <sub>8</sub> H <sub>11</sub> NO                               | 137.0841 | <i>J. endophytica</i> 161111       | <i>X. granatum</i>                            | Root      | Broth (glucose 2%, yeast extract 0.5%, peptone 0.5%, KNO <sub>3</sub> 1.5%, CaCO <sub>3</sub> 0.4%, and NaCl 0.4% (pH 7.2)) | [62] |
| Asperazine (262)                                                                                | C <sub>40</sub> H <sub>36</sub> N <sub>6</sub> O <sub>4</sub>   | 664.2798 | <i>Aspergillus</i> sp. KJ-9        | <i>M. azedarach</i>                           | Stem Bark |                                                                                                                             | [44] |
| (R)-3-hydroxybutanonitrile (263)                                                                | C <sub>4</sub> H <sub>7</sub> NO                                | 85.0528  | <i>Aspergillus</i> sp. KJ-9        | <i>M. azedarach</i>                           | Stem Bark |                                                                                                                             | [34] |
| 3-hydroxy-2-methoxy-5-methylpyridin-2(1H)-one (264)                                             | C <sub>7</sub> H <sub>9</sub> NO <sub>3</sub>                   | 155.0582 | <i>B. dothidea</i> KJ-1            | <i>M. azedarach</i> L.                        | Stem      | Rice                                                                                                                        | [34] |
| 3-hydroxy-N-(1-hydroxy-3-methylpentan-2-yl)-5-oxohexanamide (265)                               | C <sub>12</sub> H <sub>23</sub> NO <sub>4</sub>                 | 245.1627 | <i>B. dothidea</i> KJ-1            | <i>M. azedarach</i> L.                        | Stem      | Rice                                                                                                                        | [34] |
| 3-hydroxy-N-(1-hydroxy-4-methylpentan-2-yl)-5-oxohexanamide (266)                               | C <sub>12</sub> H <sub>23</sub> NO <sub>4</sub>                 | 245.1627 | <i>B. dothidea</i> KJ-1            | <i>M. azedarach</i> L.                        | Stem      | Rice                                                                                                                        | [34] |
| (2S,3aR,6S,7aS) -6-acetamido-octahydro-1,3-benzothiazol-2-yl 2-(adamantan-1-yl) acetamide (267) | C <sub>21</sub> H <sub>33</sub> N <sub>3</sub> O <sub>2</sub> S | 391.2293 | <i>Emericella</i> sp.              | <i>A. indica</i> A. Juss                      | Twig      | Liquid media containing 10 g glucose, 5 g peptone, 3 g malt extract, and 3 g yeast extract                                  | [63] |
| <b>Nitro Compounds</b>                                                                          |                                                                 |          |                                    |                                               |           |                                                                                                                             |      |
| 3-nitropropionic acid (268)                                                                     | C <sub>3</sub> H <sub>5</sub> NO <sub>4</sub>                   | 119.0219 | <i>Phomopsis longicolla</i> FJ2759 | <i>T. elegans</i> A. Juss ssp. <i>elegans</i> | Leaves    | BD broth                                                                                                                    | [28] |



| Fatty Acid & Sugars                                                                |                                                 |          |                             |                        |        |                |      |
|------------------------------------------------------------------------------------|-------------------------------------------------|----------|-----------------------------|------------------------|--------|----------------|------|
| Fusaroside (269)                                                                   | C <sub>34</sub> H <sub>54</sub> O <sub>13</sub> | 670.3564 | <i>Fusarium</i> sp. LN-11   | <i>M. azedarach</i>    | Leaves | Liquid Culture | [21] |
| Phalluside (270)                                                                   | C <sub>44</sub> H <sub>81</sub> NO <sub>8</sub> | 751.5962 | <i>Fusarium</i> sp. LN-11   | <i>M. azedarach</i>    | Leaves | Liquid Culture | [21] |
| (9 <i>R</i> ,10 <i>R</i> ,7 <i>E</i> )-6,9,10-trihydroxyoctadec-7-enoic acid (271) | C <sub>18</sub> H <sub>34</sub> O <sub>5</sub>  | 330.2406 | <i>Fusarium</i> sp. LN-11   | <i>M. azedarach</i>    | Leaves | Liquid Culture | [21] |
| Porrigenic acid (272)                                                              | C <sub>18</sub> H <sub>30</sub> O <sub>4</sub>  | 310.2144 | <i>Fusarium</i> sp. LN-11   | <i>M. azedarach</i>    | Leaves | Liquid Culture | [21] |
| (9 <i>Z</i> )-2,3-dihydroxypropyl octadeca-9-enoate (273)                          | C <sub>21</sub> H <sub>40</sub> O <sub>4</sub>  | 356.2927 | <i>Fusarium</i> sp. LN-11   | <i>M. azedarach</i>    | Leaves | Liquid Culture | [21] |
| Cerebroside C (274)                                                                | C <sub>39</sub> H <sub>71</sub> NO <sub>9</sub> | 697.5129 | <i>B. dothidea</i> KJ-1     | <i>M. azedarach</i> L. | Stem   | Rice           | [44] |
| Eucalyptacid A (275)                                                               | C <sub>17</sub> H <sub>32</sub> O <sub>5</sub>  | 316.2250 | <i>D. eucalyptorum</i> KY-9 | <i>M. azedarach</i>    | Leaves | Rice           | [50] |
| Phomopene (276)                                                                    | C <sub>10</sub> H <sub>18</sub> O <sub>3</sub>  | 186.1256 | <i>D. eucalyptorum</i> KY-9 | <i>M. azedarach</i>    | Leaves | Rice           | [50] |

**Table S2.** Antimicrobial Activity of Compounds that have been evaluated against several fungi and bacteria.

| Compounds                                                | Antimicrobial                                                                                                                                                                                                                                                                                                                                                                                                                                                                                                                                                                                               | Ref. |
|----------------------------------------------------------|-------------------------------------------------------------------------------------------------------------------------------------------------------------------------------------------------------------------------------------------------------------------------------------------------------------------------------------------------------------------------------------------------------------------------------------------------------------------------------------------------------------------------------------------------------------------------------------------------------------|------|
| Helvolic acid (4)                                        | Antifungal activity (MIC: µg/mL)<br><i>B. cinerea</i> (6.25), <i>A. solani</i> (12.5), <i>A. alternata</i> (6.25), <i>C. gloeosporioides</i> (6.25), <i>F. solani</i> (50), <i>F. oxysporum</i> f. sp. <i>niveum</i> (12.5), <i>F. oxysporum</i> f. sp. <i>vasinfectum</i> (25), <i>G. saubinetii</i> (6.25); Positive control (MIC: µg/mL) carbendazim: 12.5, 12.5, 6.25, 6.25, 25, 12.5, 25, 6.25, respectively hymexazol: 12.5, 12.5, 12.5, 12.5, 50, 12.5, 2.5, 12.5, respectively                                                                                                                      | [32] |
| Pycnophorin (7)                                          | Antifungal activity (MIC: µM)<br><i>B. cinerea</i> (100), <i>A. solani</i> (6.25), <i>C. gloeosporioides</i> (200), <i>G. saubinetii</i> (200); Positive control (MIC: µM) carbendazim: 12.5, 1.57, 1.57, 6.25, respectively. hymexazol: 200, 6.25, >200, >200, respectively. toosendanin: 200, 6.25, 200, 200, respectively<br><br>Antibacterial activity (MIC: µM)<br><i>E. coli</i> (200), <i>B. subtilis</i> (25), <i>S. aureus</i> (25), <i>B. cereus</i> (50); Positive control (MIC: µM) ampicillin: 1.57, 1.57, 1.57, 12.5, respectively streptomycin sulfate: 1.57, 1.57, 1.57, 1.57, respectively | [34] |
| (1S,4S,5R,7R,10R,11R)-guaiane-5,10,11,12-tetraol (8)     | Antifungal activity (MIC: µg/mL)<br><i>C. albicans</i> YM 2005 (256), <i>A. niger</i> YM 3029 (128), <i>P. oryzae</i> YM 3051 (256), <i>F. avenaceum</i> YM 3065 (512), <i>H. compactum</i> YM 3077 (128); Positive control (MIC: µg/mL) nystatin: 8, 8, 8, 16, 8, respectively                                                                                                                                                                                                                                                                                                                             | [35] |
| (1S,4S,5S,7R,10R,11S)-guaiane-1,10,11,12-tetraol (9)     | Antifungal activity (MIC: µg/mL)<br><i>C. albicans</i> YM 2005 (256), <i>A. niger</i> YM 3029 (128), <i>P. oryzae</i> YM 3051 (256), <i>F. avenaceum</i> YM 3065 (512), <i>H. compactum</i> YM 3077 (128) :<br>Positive control (MIC: µg/mL) nystatin: 8, 8, 8, 16, 8, respectively                                                                                                                                                                                                                                                                                                                         | [35] |
| (1S,4S,5R,7R,10R,11S)-guaiane-5,10,11,12-tetraol (10)    | Antifungal activity (MIC: µg/mL)<br><i>C. albicans</i> YM 2005 (32), <i>A. niger</i> YM 3029 (64), <i>P. oryzae</i> YM 3051 (256), <i>F. avenaceum</i> YM 3065 (>512), <i>H. compactum</i> YM 3077 (64); Positive control (MIC: µg/mL) nystatin: 8, 8, 8, 16, 8, respectively                                                                                                                                                                                                                                                                                                                               | [35] |
| (1S,4S,5S,7R,10R,11R)-guaiane-1,10,11,12-tetraol (11)    | Antifungal activity (MIC: µg/mL)<br><i>C. albicans</i> YM 2005 (128), <i>A. niger</i> YM 3029 (256), <i>P. oryzae</i> YM 3051 (128), <i>F. avenaceum</i> YM 3065 (512), <i>H. compactum</i> YM 3077 (256);<br>Positive control (MIC: µg/mL) nystatin: 8, 8, 8, 16, 8, respectively                                                                                                                                                                                                                                                                                                                          | [35] |
| (1R,3S,4R,5S,7R,10R,11S)-guaiane-3,10,11,12-tetraol (12) | Antifungal activity (MIC: µg/mL)<br><i>C. albicans</i> YM 2005 (64), <i>A. niger</i> YM 3029 (64), <i>P. oryzae</i> YM 3051 (256), <i>F. avenaceum</i> YM 3065 (>512), <i>H. compactum</i> YM 3077 (256); Positive control (MIC: µg/mL) nystatin: 8, 8, 8, 16, 8, respectively                                                                                                                                                                                                                                                                                                                              | [35] |
| (1R,3R,4R,5S,7R,10R,11R)-guaiane-3,10,11,12-tetraol (13) | Antifungal activity (MIC: µg/mL)<br><i>C. albicans</i> YM 2005 (64), <i>A. niger</i> YM 3029 (512), <i>P. oryzae</i> YM 3051 (256), <i>F. avenaceum</i> YM 3065 (>512), <i>H. compactum</i> YM 3077 (128)<br>Positive control (MIC: µg/mL) nystatin: 8, 8, 8, 16, 8, respectively                                                                                                                                                                                                                                                                                                                           | [35] |
| (1R,4S,5S,7S,9R,10S,11R)-guaiane-9,10,11,12-tetraol (14) | Antifungal activity (MIC: µg/mL)<br><i>C. albicans</i> YM 2005 (128), <i>A. niger</i> YM 3029 (512), <i>P. oryzae</i> YM 3051 (128), <i>F. avenaceum</i> YM 3065 (512),                                                                                                                                                                                                                                                                                                                                                                                                                                     | [35] |

|                                                                                                                  |                                                                                                                                                                                                                                                                                                |  |
|------------------------------------------------------------------------------------------------------------------|------------------------------------------------------------------------------------------------------------------------------------------------------------------------------------------------------------------------------------------------------------------------------------------------|--|
|                                                                                                                  | <i>H. compactum</i> YM 3077 (128);<br>Positive control (MIC: µg/mL) nystatin: 8, 8, 8, 16, 8, respectively                                                                                                                                                                                     |  |
| (1 <i>R</i> ,4 <i>S</i> ,5 <i>S</i> ,7 <i>R</i> ,10 <i>R</i> ,11 <i>S</i> )-guaiane-10,11,12-triol ( <b>15</b> ) | Antifungal activity (MIC: µg/mL) [35]<br><i>C. albicans</i> YM 2005 (32), <i>A. niger</i> YM 3029 (128),<br><i>P. oryzae</i> YM 3051 (512), <i>F. avenaceum</i> YM 3065 (>512), <i>H. compactum</i> YM 3077 (256);<br>Positive control (MIC: µg/mL) nystatin: 8, 8, 8, 16, 8, respectively     |  |
| (1 <i>R</i> ,4 <i>S</i> ,5 <i>S</i> ,7 <i>R</i> ,10 <i>R</i> ,11 <i>R</i> )-guaiane-10,11,12-triol ( <b>16</b> ) | Antifungal activity (MIC: µg/mL) [35]<br><i>C. albicans</i> YM 2005 (128), <i>A. niger</i> YM 3029 (256),<br><i>P. oryzae</i> YM 3051 (512), <i>F. avenaceum</i> YM 3065 (>512),<br><i>H. compactum</i> YM 3077 (128);<br>Positive control (MIC: µg/mL) nystatin: 8, 8, 8, 16, 8, respectively |  |
| 14α,16-epoxy-18-norisopimar-7-en-4α-ol ( <b>17</b> )                                                             | Antifungal activity (MIC: µg/mL) [35]<br><i>C. albicans</i> YM 2005 (128), <i>A. niger</i> YM 3029 (>512),<br><i>P. oryzae</i> YM 3051 (256), <i>F. avenaceum</i> YM 3065 (512),<br><i>H. compactum</i> YM 3077 (256);<br>Positive control (MIC: µg/mL) nystatin: 8, 8, 8, 16, 8, respectively |  |
| 16-O-sulfo-18-norisopimar-7-en-4α,16-diol ( <b>18</b> )                                                          | Antifungal activity (MIC: µg/mL) [35]<br><i>C. albicans</i> YM 2005 (64), <i>A. niger</i> YM 3029 (64),<br><i>P. oryzae</i> YM 3051 (256), <i>F. avenaceum</i> YM 3065 (64), <i>H. compactum</i> YM 3077 (128);<br>Positive control (MIC: µg/mL) nystatin: 8, 8, 8, 16, 8, respectively        |  |
| 9-deoxy-hymatoxin A ( <b>19</b> )                                                                                | Antifungal activity (MIC: µg/mL) [35]<br><i>C. albicans</i> YM 2005 (64), <i>A. niger</i> YM 3029 (128),<br><i>P. oryzae</i> YM 3051 (32), <i>F. avenaceum</i> YM 3065 (128),<br><i>H. compactum</i> YM 3077 (64);<br>Positive control (MIC: µg/mL) nystatin: 8, 8, 8, 16, 8, respectively     |  |
| guaiane-2,10,11,12-tetraol ( <b>20</b> )                                                                         | Antifungal activity (MIC: µg/mL) [36]<br><i>C. albicans</i> YM 2005 (16), <i>A. niger</i> YM 3029 (32),<br><i>P. oryzae</i> YM 3051 (16), <i>F. avenaceum</i> YM 3065 (64),<br><i>H. compactum</i> YM 3077 (64);<br>Positive control (MIC: µg/mL) nystatin: 8, 8, 8, 16, 8, respectively       |  |
| guaiane-2,4,10,11,12-pentaol ( <b>21</b> )                                                                       | Antifungal activity (MIC: µg/mL) [36]<br><i>C. albicans</i> YM 2005 (512), <i>A. niger</i> YM 3029 (256),<br><i>P. oryzae</i> YM 3051 (128), <i>F. avenaceum</i> YM 3065 (>512),<br><i>H. compactum</i> YM 3077 (256);<br>Positive control (MIC: µg/mL) nystatin: 8, 8, 8, 16, 8, respectively |  |
| guaiane-4,5,10,11,12-pentaol ( <b>22</b> )                                                                       | Antifungal activity (MIC: µg/mL) [36]<br><i>C. albicans</i> YM 2005 (128), <i>A. niger</i> YM 3029 (>512),<br><i>P. oryzae</i> YM 3051 (256), <i>F. avenaceum</i> YM 3065 (>512), <i>H. compactum</i> YM 3077 (256);<br>Positive control (MIC: µg/mL) nystatin: 8, 8, 8, 16, 8, respectively   |  |
| guaiane-1,5,10,11,12-pentaol ( <b>23</b> )                                                                       | Antifungal activity (MIC: µg/mL) [36]<br><i>C. albicans</i> YM 2005 (64), <i>A. niger</i> YM 3029 (64),<br><i>P. oryzae</i> YM 3051 (256), <i>F. avenaceum</i> YM 3065 (>512),<br><i>H. compactum</i> YM 3077 (64);                                                                            |  |

|                                                       |                                                                                                                                                                                                                                                                                                                                                                                                                                                                                                                                  |      |
|-------------------------------------------------------|----------------------------------------------------------------------------------------------------------------------------------------------------------------------------------------------------------------------------------------------------------------------------------------------------------------------------------------------------------------------------------------------------------------------------------------------------------------------------------------------------------------------------------|------|
|                                                       | Positive control (MIC: µg/mL) nystatin: 8, 8, 8, 16, 8, respectively                                                                                                                                                                                                                                                                                                                                                                                                                                                             |      |
| 11-methoxyguaiane-4,10,12-triol (24)                  | Antifungal activity (MIC: µg/mL)<br><i>C. albicans</i> YM 2005 (32), <i>A. niger</i> YM 3029 (256),<br><i>P. oryzae</i> YM 3051 (32), <i>F. avenaceum</i> YM 3065 (>512),<br><i>H. compactum</i> YM 3077 (64)<br>Positive control (MIC: µg/mL) nystatin: 8, 8, 8, 16, 8, respectively                                                                                                                                                                                                                                            | [36] |
| (7R,10S)-7,10-epoxysydonic acid (47)                  | Antibacterial activity against <i>S. aureus</i> ATCC 25923 with IC <sub>50</sub> value of >50 µM; Positive control (IC <sub>50</sub> : µM) penicillin: 23.6, rocephin: 1.3                                                                                                                                                                                                                                                                                                                                                       | [40] |
| (7S,10S)-7,10-epoxysydonic acid (48)                  | Antibacterial activity against <i>S. aureus</i> ATCC 25923 with IC <sub>50</sub> value of 32.2 µM; Positive control (IC <sub>50</sub> : µM) penicillin: 23.6, rocephin: 1.3                                                                                                                                                                                                                                                                                                                                                      | [40] |
| (7R,11S)-7,12-epoxysydonic acid (49)                  | Antibacterial activity against <i>S. aureus</i> ATCC 25923 with IC <sub>50</sub> value of 36.0 µM; Positive control (IC <sub>50</sub> : µM), penicillin: 23.6, rocephin: 1.3                                                                                                                                                                                                                                                                                                                                                     | [40] |
| (7S,11S)-7,12-epoxysydonic acid (50)                  | Antibacterial activity against <i>S. aureus</i> ATCC 25923 with IC <sub>50</sub> value of >50 µM; Positive control (IC <sub>50</sub> : µM), penicillin: 23.6, rocephin: 1.3                                                                                                                                                                                                                                                                                                                                                      | [40] |
| 7-deoxy-7,14-didehydro-12-hydroxysydonic acid (51)    | Antibacterial activity against <i>S. aureus</i> ATCC 25923 with IC <sub>50</sub> value of 41.9 µM<br>Positive control (IC <sub>50</sub> : µM) penicillin: 23.6, rocephin: 1.3                                                                                                                                                                                                                                                                                                                                                    | [40] |
| (Z)-7-deoxy-7,8-didehydro-12-hydroxysydonic acid (52) | Antibacterial activity against <i>S. aureus</i> ATCC 25923 with IC <sub>50</sub> value of >50 µM; Positive control (IC <sub>50</sub> : µM) penicillin: 23.6, rocephin: 1.3                                                                                                                                                                                                                                                                                                                                                       | [40] |
| (E)-7-deoxy-7,8-didehydro-12-hydroxysydonic acid (53) | Antibacterial activity against <i>S. aureus</i> ATCC 25923 with IC <sub>50</sub> value of 31.5 µM;<br>Positive control (IC <sub>50</sub> : µM) penicillin: 23.6, rocephin: 1.3                                                                                                                                                                                                                                                                                                                                                   | [40] |
| (+)-1-hydroxyboivinianic acid (54)                    | Antibacterial activity against <i>S. aureus</i> ATCC 25923 with IC <sub>50</sub> value of >50 µM; Positive control (IC <sub>50</sub> : µM) penicillin: 23.6, rocephin: 1.3                                                                                                                                                                                                                                                                                                                                                       | [40] |
| engyodontiumone I (55)                                | Antibacterial activity against <i>S. aureus</i> ATCC 25923 with IC <sub>50</sub> value of 33.4 µM; Positive control (IC <sub>50</sub> : µM) penicillin: 23.6, rocephin: 1.3                                                                                                                                                                                                                                                                                                                                                      | [40] |
| (+)-sydonic acid (56)                                 | Antibacterial activity against <i>S. aureus</i> ATCC 25923 with IC <sub>50</sub> value of >50 µM; Positive control (IC <sub>50</sub> : µM) penicillin: 23.6, rocephin: 1.3                                                                                                                                                                                                                                                                                                                                                       | [40] |
| (+)-hydroxysydonic acid (57)                          | Antibacterial activity against <i>S. aureus</i> ATCC 25923 with IC <sub>50</sub> value of 34.0 µM, Positive control (IC <sub>50</sub> : µM) penicillin: 23.6, rocephin: 1.3                                                                                                                                                                                                                                                                                                                                                      | [40] |
| (-)-(7S)-10-hydroxysydonic acid (58)                  | Antibacterial activity against <i>S. aureus</i> ATCC 25923 with IC <sub>50</sub> value of 36.3 µM; Positive control (IC <sub>50</sub> : µM) penicillin: 23.6; rocephin: 1.3                                                                                                                                                                                                                                                                                                                                                      | [40] |
| Verruculogen (209)                                    | Antibacterial activity<br>Bacteriostatic effect for <i>E. coli</i> at a dosage of 250 µg/mL.<br>Control: penicillin, vancomycin, and tetracycline tested at a conc. of 25 µg/ML<br>Antifungal activity (MIC: µg/mL)<br><i>B. cinerea</i> (6.25), <i>A. solani</i> (12.5), <i>A. alternata</i> (6.25), <i>C. gloeosporioides</i> (6.25), <i>F. solani</i> (50), <i>F. oxysporum</i> f. sp. <i>niveum</i> (12.5), <i>F. oxysporum</i> f. sp. <i>vasinfectum</i> (25), <i>G. saubinetii</i> (6.25)<br>Positive control (MIC: µg/mL) | [46] |

|                                                |                                                                                                                                                                                                                                                                                                                                                                                                                                                                                                         |  |
|------------------------------------------------|---------------------------------------------------------------------------------------------------------------------------------------------------------------------------------------------------------------------------------------------------------------------------------------------------------------------------------------------------------------------------------------------------------------------------------------------------------------------------------------------------------|--|
|                                                | carbendazim: 12.5, 12.5, 6.25, 6.25, 25, 12.5, 25, 6.25, respectively<br>hymexazol: 12.5, 12.5, 12.5, 12.5, 50, 12.5, 2.5, 12.5, respectively                                                                                                                                                                                                                                                                                                                                                           |  |
| Fumitremorgin C (212)                          | Antifungal activity (MIC: µg/mL) [32]<br><i>B. cinerea</i> (12.5), <i>A. solani</i> (25), <i>A. alternata</i> (12.5), <i>C. gloeosporioides</i> (12.5), <i>F. solani</i> (50), <i>F. oxysporum</i> f. sp. <i>niveum</i> (25), <i>F. oxysporum</i> f. sp. <i>vasinfectum</i> (50), <i>G. saubinettii</i> (12.5)<br>Positive control (MIC: µg/mL)<br>carbendazim: 12.5, 12.5, 6.25, 6.25, 25, 12.5, 25, 6.25, respectively<br>hymexazol: 12.5, 12.5, 12.5, 12.5, 50, 12.5, 2.5, 12.5, respectively        |  |
| Cyclotryprostatin A (213)                      | Antifungal activity (MIC: µg/mL) [32]<br><i>B. cinerea</i> (50), <i>A. solani</i> (50), <i>A. alternata</i> (25), <i>C. gloeosporioides</i> (50), <i>F. solani</i> (>100),<br><i>F. oxysporum</i> f. sp. <i>niveum</i> (50), <i>F. oxysporum</i> f. sp. <i>vasinfectum</i> (100), <i>G. saubinettii</i> (50)<br>Positive control (MIC: µg/mL)<br>carbendazim: 12.5, 12.5, 6.25, 6.25, 25, 12.5, 25, 6.25, respectively<br>hymexazol: 12.5, 12.5, 12.5, 12.5, 50, 12.5, 2.5, 12.5, respectively          |  |
| Cyclotryprostatin B (214)                      | Antifungal activity (MIC: µg/mL) [32]<br><i>B. cinerea</i> (12.5), <i>A. solani</i> (12.5), <i>A. alternata</i> (12.5), <i>C. gloeosporioides</i> (12.5), <i>F. solani</i> (25), <i>F. oxysporum</i> f. sp. <i>niveum</i> (12.5), <i>F. oxysporum</i> f. sp. <i>vasinfectum</i> (25), <i>G. saubinettii</i> (12.5)<br>Positive control (MIC: µg/mL)<br>carbendazim: 12.5, 12.5, 6.25, 6.25, 25, 12.5, 25, 6.25, respectively<br>hymexazol: 12.5, 12.5, 12.5, 12.5, 50, 12.5, 2.5, 12.5, respectively    |  |
| Verrulocogen TR-2 (215)                        | Antifungal activity (MIC: µg/mL) [32]<br><i>B. cinerea</i> (12.5), <i>A. solani</i> (12.5), <i>A. alternata</i> (6.25), <i>C. gloeosporioides</i> (12.5), <i>F. solani</i> (25), <i>F. oxysporum</i> f. sp. <i>niveum</i> (12.5), <i>F. oxysporum</i> f. sp. <i>vasinfectum</i> (25), <i>G. saubinettii</i> (12.5)<br>Positive control (MIC: µg/mL)<br>carbendazim: 12.5, 12.5, 6.25, 6.25, 25, 12.5, 25, 6.25, respectively<br>hymexazol: 12.5, 12.5, 12.5, 12.5, 50, 12.5, 2.5, 12.5, respectively    |  |
| 12β-hydroxyverruculogen TR-2 (216)             | Antifungal activity (MIC: µg/mL) [32]<br><i>B. cinerea</i> (25), <i>A. solani</i> (25), <i>A. alternata</i> (25), <i>C. gloeosporioides</i> (25), <i>F. solani</i> (50), <i>F. oxysporum</i> f. sp. <i>niveum</i> (25), <i>F. oxysporum</i> f. sp. <i>vasinfectum</i> (25), <i>G. saubinettii</i> (25)<br>Positive control (MIC: µg/mL)<br>carbendazim: 12.5, 12.5, 6.25, 6.25, 25, 12.5, 25, 6.25, respectively<br>hymexazol: 12.5, 12.5, 12.5, 12.5, 50, 12.5, 2.5, 12.5, respectively                |  |
| 12β-hydroxy-13α-methoxyverruculogen TR-2 (217) | Antifungal activity (MIC: µg/mL) [32]<br><i>B. cinerea</i> (6.25), <i>A. solani</i> (6.25), <i>A. alternata</i> (6.25), <i>C. gloeosporioides</i> (6.25),<br><i>F. solani</i> (25), <i>F. oxysporum</i> f. sp. <i>niveum</i> (12.5), <i>F. oxysporum</i> f. sp. <i>vasinfectum</i> (25), <i>G. saubinettii</i> (6.25)<br>Positive control (MIC: µg/mL)<br>carbendazim: 12.5, 12.5, 6.25, 6.25, 25, 12.5, 25, 6.25, respectively<br>hymexazol: 12.5, 12.5, 12.5, 12.5, 50, 12.5, 2.5, 12.5, respectively |  |
| Fumitremorgin B (218)                          | Antifungal activity (MIC: µg/mL) [32]<br><i>B. cinerea</i> (6.25), <i>A. solani</i> (6.25), <i>A. alternata</i> (6.25), <i>C. gloeosporioides</i> (12.5), <i>F. solani</i> (100), <i>F. oxysporum</i> f. sp. <i>niveum</i> (25), <i>F. oxysporum</i> f. sp. <i>vasinfectum</i> (50), <i>G. saubinettii</i> (12.5)                                                                                                                                                                                       |  |

|                                    |                                                                                                                                                                                                                                                                                                                                                                                                                                                                                                                |  |
|------------------------------------|----------------------------------------------------------------------------------------------------------------------------------------------------------------------------------------------------------------------------------------------------------------------------------------------------------------------------------------------------------------------------------------------------------------------------------------------------------------------------------------------------------------|--|
|                                    | <p>Positive control (MIC: µg/mL)<br/> carbendazim: 12.5, 12.5, 6.25, 6.25, 25, 12.5, 25, 6.25, respectively<br/> hymexazol: 12.5, 12.5, 12.5, 12.5, 50, 12.5, 2.5, 12.5, respectively</p>                                                                                                                                                                                                                                                                                                                      |  |
| Tryprostatin A (219)               | <p>Antifungal activity (MIC: µg/mL) [32]<br/> <i>B. cinerea</i>, <i>A. solani</i>, <i>A. alternata</i>, <i>C. gloeosporioides</i>, <i>Fusarium solani</i>, <i>F. oxysporum</i> f. sp. <i>niveum</i>, <i>F. oxysporum</i> f. sp. <i>vasinfectum</i>, <i>G. saubinettii</i> (&gt;100)<br/> Positive control (MIC: µg/mL)<br/> carbendazim: 12.5, 12.5, 6.25, 6.25, 25, 12.5, 25, 6.25, respectively<br/> hymexazol: 12.5, 12.5, 12.5, 12.5, 50, 12.5, 2.5, 12.5, respectively</p>                                |  |
| Cyclo-L-tryptophyl-L-proline (220) | <p>Antifungal activity (MIC: µg/mL) [32]<br/> <i>B. cinerea</i>, <i>A. solani</i>, <i>A. alternata</i>, <i>C. gloeosporioides</i>, <i>Fusarium solani</i>, <i>F. oxysporum</i> f. sp. <i>niveum</i>, <i>F. oxysporum</i> f. sp. <i>vasinfectum</i>, <i>G. saubinettii</i> (&gt;100)<br/> Positive control (MIC: µg/mL)<br/> carbendazim: 12.5, 12.5, 6.25, 6.25, 25, 12.5, 25, 6.25, respectively<br/> hymexazol: 12.5, 12.5, 12.5, 12.5, 50, 12.5, 2.5, 12.5, respectively</p>                                |  |
| Terezine D (221)                   | <p>Antifungal activity (MIC: µg/mL) [32]<br/> <i>B. cinerea</i>, <i>A. solani</i>, <i>A. alternata</i>, <i>C. gloeosporioides</i>, <i>Fusarium solani</i>, <i>F. oxysporum</i> f. sp. <i>niveum</i>, <i>F. oxysporum</i> f. sp. <i>vasinfectum</i>, <i>G. saubinettii</i> (&gt;100)<br/> Positive control (MIC: µg/mL)<br/> carbendazim: 12.5, 12.5, 6.25, 6.25, 25, 12.5, 25, 6.25, respectively<br/> hymexazol: 12.5, 12.5, 12.5, 12.5, 50, 12.5, 2.5, 12.5, respectively</p>                                |  |
| Fumiquinazoline F (222)            | <p>Antifungal activity (MIC: µg/mL) [32]<br/> <i>B. cinerea</i> (12.5), <i>A. solani</i> (25), <i>A. alternata</i> (12.5), <i>C. gloeosporioides</i> (12.5), <i>F. solani</i>(50), <i>F. oxysporum</i> f. sp. <i>niveum</i> (25), <i>F. oxysporum</i> f. sp. <i>vasinfectum</i> (50), <i>G. saubinettii</i> (12.5)<br/> Positive control (MIC: µg/mL)<br/> carbendazim: 12.5, 12.5, 6.25, 6.25, 25, 12.5, 25, 6.25, respectively<br/> hymexazol: 12.5, 12.5, 12.5, 12.5, 50, 12.5, 2.5, 12.5, respectively</p> |  |
| Fumiquinazoline G (223)            | <p>Antifungal activity (MIC: µg/mL) [32]<br/> <i>B. cinerea</i> (12.5), <i>A. solani</i> (25), <i>A. alternata</i> (12.5), <i>C. gloeosporioides</i> (12.5), <i>F. solani</i>(50), <i>F. oxysporum</i> f. sp. <i>niveum</i> (50), <i>F. oxysporum</i> f. sp. <i>vasinfectum</i> (50), <i>G. saubinettii</i> (12.5)<br/> Positive control (MIC: µg/mL)<br/> carbendazim: 12.5, 12.5, 6.25, 6.25, 25, 12.5, 25, 6.25, respectively<br/> hymexazol: 12.5, 12.5, 12.5, 12.5, 50, 12.5, 2.5, 12.5, respectively</p> |  |
| Fumiquinazoline D (224)            | <p>Antifungal activity (MIC: µg/mL) [32]<br/> <i>B. cinerea</i> (25), <i>A. solani</i> (25), <i>A. alternata</i> (25), <i>C. gloeosporioides</i> (25), <i>F. solani</i>(&gt;100), <i>F. oxysporum</i> f. sp. <i>niveum</i> (50), <i>F. oxysporum</i> f. sp. <i>vasinfectum</i> (50), <i>G. saubinettii</i> (25)<br/> Positive control (MIC: µg/mL)<br/> carbendazim: 12.5, 12.5, 6.25, 6.25, 25, 12.5, 25, 6.25, respectively<br/> hymexazol: 12.5, 12.5, 12.5, 12.5, 50, 12.5, 2.5, 12.5, respectively</p>    |  |
| Fumiquinazoline A (225)            | <p>Antifungal activity (MIC: µg/mL) [32]<br/> <i>B. cinerea</i> (12.5), <i>A. solani</i> (12.5), <i>A. alternata</i> (12.5), <i>C. gloeosporioides</i> (12.5), <i>F. solani</i>(50), <i>F. oxysporum</i> f. sp. <i>niveum</i> (25), <i>F. oxysporum</i> f. sp. <i>vasinfectum</i> (50), <i>G. saubinettii</i> (12.5)</p>                                                                                                                                                                                       |  |

|                                                                                                         |                                                                                                                                                                                                                                                                                                                                                                                                                                                                                                           |  |
|---------------------------------------------------------------------------------------------------------|-----------------------------------------------------------------------------------------------------------------------------------------------------------------------------------------------------------------------------------------------------------------------------------------------------------------------------------------------------------------------------------------------------------------------------------------------------------------------------------------------------------|--|
|                                                                                                         | Positive control (MIC: µg/mL)<br>carbendazim: 12.5, 12.5, 6.25, 6.25, 25, 12.5, 25, 6.25, respectively<br>hymexazol: 12.5, 12.5, 12.5, 12.5, 50, 12.5, 2.5, 12.5, respectively                                                                                                                                                                                                                                                                                                                            |  |
| 3-hydroxyfumiquinazoline A (226)                                                                        | Antifungal activity (MIC: µg/mL) [32]<br><i>B. cinerea</i> (12.5), <i>A. solani</i> (12.5),<br><i>A. alternata</i> (12.5), <i>C. gloeosporioides</i> (12.5), <i>F. solani</i> (100), <i>F. oxysporum</i> f. sp. <i>niveum</i> (50),<br><i>F. oxysporum</i> f. sp. <i>vasinfectum</i> (50), <i>G. saubinettii</i> (12.5)<br>Positive control (MIC: µg/mL)<br>carbendazim: 12.5, 12.5, 6.25, 6.25, 25, 12.5, 25, 6.25, respectively<br>hymexazol: 12.5, 12.5, 12.5, 12.5, 50, 12.5, 2.5, 12.5, respectively |  |
| 6-methoxyspirotryprostatin B (227)                                                                      | Antifungal activity (MIC: µg/mL) [32]<br><i>B. cinerea</i> , <i>A. solani</i> , <i>A. alternata</i> , <i>C. gloeosporioides</i> , <i>Fusarium solani</i> , <i>F. oxysporum</i> f. sp. <i>niveum</i> , <i>F. oxysporum</i> f. sp. <i>vasinfectum</i> ,<br><i>G. saubinettii</i> (>100)<br>Positive control (MIC: µg/mL)<br>carbendazim: 12.5, 12.5, 6.25, 6.25, 25, 12.5, 25, 6.25, respectively<br>hymexazol: 12.5, 12.5, 12.5, 12.5, 50, 12.5, 2.5, 12.5, respectively                                   |  |
| Spiro [5H,10H-dipyrrolo[1,2- $\alpha$ :1',2'-d]pyrazine-2-(3H),2'-[2H]indole]-3',5,10(1'H)-trione (228) | Antifungal activity (MIC: µg/mL) [32]<br><i>B. cinerea</i> , <i>A. solani</i> , <i>A. alternata</i> , <i>C. gloeosporioides</i> , <i>Fusarium solani</i> , <i>F. oxysporum</i> f. sp. <i>niveum</i> , <i>F. oxysporum</i> f. sp. <i>vasinfectum</i> ,<br><i>G. saubinettii</i> (>100)<br>Positive control (MIC: µg/mL)<br>carbendazim: 12.5, 12.5, 6.25, 6.25, 25, 12.5, 25, 6.25, respectively<br>hymexazol: 12.5, 12.5, 12.5, 12.5, 50, 12.5, 2.5, 12.5, respectively                                   |  |
| Pseurotin A (229)                                                                                       | Antifungal activity (MIC: µg/mL) [32]<br><i>B. cinerea</i> , <i>A. solani</i> , <i>A. alternata</i> , <i>C. gloeosporioides</i> , <i>Fusarium solani</i> , <i>F. oxysporum</i> f. sp. <i>niveum</i> , <i>F. oxysporum</i> f. sp. <i>vasinfectum</i> ,<br><i>G. saubinettii</i> (>100) [32]<br>Positive control (MIC: µg/mL)<br>carbendazim: 12.5, 12.5, 6.25, 6.25, 25, 12.5, 25, 6.25, respectively<br>hymexazol: 12.5, 12.5, 12.5, 12.5, 50, 12.5, 2.5, 12.5, respectively                              |  |
| Pseurotin A <sub>1</sub> (230)                                                                          | Antifungal activity (MIC: µg/mL) [32]<br><i>B. cinerea</i> , <i>A. solani</i> , <i>A. alternata</i> , <i>C. gloeosporioides</i> , <i>Fusarium solani</i> , <i>F. oxysporum</i> f. sp. <i>niveum</i> , <i>F. oxysporum</i> f. sp. <i>vasinfectum</i> ,<br><i>G. saubinettii</i> (>100)<br>Positive control (MIC: µg/mL)<br>carbendazim: 12.5, 12.5, 6.25, 6.25, 25, 12.5, 25, 6.25, respectively<br>hymexazol: 12.5, 12.5, 12.5, 12.5, 50, 12.5, 2.5, 12.5, respectively                                   |  |
| Tryptoquivaline O (231)                                                                                 | Antifungal activity (MIC: µg/mL) [32]<br><i>B. cinerea</i> (25), <i>A. solani</i> (12.5), <i>A. alternata</i> (25), <i>C. gloeosporioides</i> (100), <i>F. solani</i> (>100),<br><i>F. oxysporum</i> f. sp. <i>niveum</i> (>100), <i>F. oxysporum</i> f. sp. <i>vasinfectum</i> (>100), <i>G. saubinettii</i> (50)<br>Positive control (MIC: µg/mL)<br>carbendazim: 12.5, 12.5, 6.25, 6.25, 25, 12.5, 25, 6.25, respectively<br>hymexazol: 12.5, 12.5, 12.5, 12.5, 50, 12.5, 2.5, 12.5, respectively      |  |
| Fumifaclavine B (232)                                                                                   | Antifungal activity (MIC: µg/mL) [32]                                                                                                                                                                                                                                                                                                                                                                                                                                                                     |  |

|                                         |                                                                                                                                                                                                                                                                                                                                                                                                                                                                                         |  |
|-----------------------------------------|-----------------------------------------------------------------------------------------------------------------------------------------------------------------------------------------------------------------------------------------------------------------------------------------------------------------------------------------------------------------------------------------------------------------------------------------------------------------------------------------|--|
|                                         | <p><i>B. cinerea</i>, <i>A. solani</i>, <i>A. alternata</i>, <i>C. gloeosporioides</i>, <i>Fusarium solani</i>, <i>F. oxysporum</i> f. sp. <i>niveum</i>, <i>F. oxysporum</i> f. sp. <i>vasinfectum</i>, <i>G. saubinettii</i> (&gt;100)</p> <p>Positive control (MIC: µg/mL)</p> <p>carbendazim: 12.5, 12.5, 6.25, 6.25, 25, 12.5, 25, 6.25, respectively</p> <p>hymexazol: 12.5, 12.5, 12.5, 12.5, 50, 12.5, 2.5, 12.5, respectively</p>                                              |  |
| Bisdethiobis(methylthio)gliotoxin (233) | <p>Antifungal activity (MIC: µg/mL) [32]</p> <p><i>B. cinerea</i>, <i>A. solani</i>, <i>A. alternata</i>, <i>C. gloeosporioides</i>, <i>Fusarium solani</i>, <i>F. oxysporum</i> f. sp. <i>niveum</i>, <i>F. oxysporum</i> f. sp. <i>vasinfectum</i>, <i>G. saubinettii</i> (&gt;100)</p> <p>Positive control (MIC: µg/mL)</p> <p>carbendazim: 12.5, 12.5, 6.25, 6.25, 25, 12.5, 25, 6.25, respectively</p> <p>hymexazol: 12.5, 12.5, 12.5, 12.5, 50, 12.5, 2.5, 12.5, respectively</p> |  |
| Cyclo-(Pro-Gly) (234)                   | <p>Antifungal activity (MIC: µg/mL) [32]</p> <p><i>B. cinerea</i>, <i>A. solani</i>, <i>A. alternata</i>, <i>C. gloeosporioides</i>, <i>Fusarium solani</i>, <i>F. oxysporum</i> f. sp. <i>niveum</i>, <i>F. oxysporum</i> f. sp. <i>vasinfectum</i>, <i>G. saubinettii</i> (&gt;100)</p> <p>Positive control (MIC: µg/mL)</p> <p>carbendazim: 12.5, 12.5, 6.25, 6.25, 25, 12.5, 25, 6.25, respectively</p> <p>hymexazol: 12.5, 12.5, 12.5, 12.5, 50, 12.5, 2.5, 12.5, respectively</p> |  |
| Cyclo-(Pro-Ala) (235)                   | <p>Antifungal activity (MIC: µg/mL) [32]</p> <p><i>B. cinerea</i>, <i>A. solani</i>, <i>A. alternata</i>, <i>C. gloeosporioides</i>, <i>Fusarium solani</i>, <i>F. oxysporum</i> f. sp. <i>niveum</i>, <i>F. oxysporum</i> f. sp. <i>vasinfectum</i>, <i>G. saubinettii</i> (&gt;100)</p> <p>Positive control (MIC: µg/mL)</p> <p>carbendazim: 12.5, 12.5, 6.25, 6.25, 25, 12.5, 25, 6.25, respectively</p> <p>hymexazol: 12.5, 12.5, 12.5, 12.5, 50, 12.5, 2.5, 12.5, respectively</p> |  |
| Cyclo-(D-Pro-L-Ala) (236)               | <p>Antifungal activity (MIC: µg/mL) [32]</p> <p><i>B. cinerea</i>, <i>A. solani</i>, <i>A. alternata</i>, <i>C. gloeosporioides</i>, <i>Fusarium solani</i>, <i>F. oxysporum</i> f. sp. <i>niveum</i>, <i>F. oxysporum</i> f. sp. <i>vasinfectum</i>, <i>G. saubinettii</i> (&gt;100)</p> <p>Positive control (MIC: µg/mL)</p> <p>carbendazim: 12.5, 12.5, 6.25, 6.25, 25, 12.5, 25, 6.25, respectively</p> <p>hymexazol: 12.5, 12.5, 12.5, 12.5, 50, 12.5, 2.5, 12.5, respectively</p> |  |
| Cyclo-(Pro-Ser) (237)                   | <p>Antifungal activity (MIC: µg/mL) [32]</p> <p><i>B. cinerea</i>, <i>A. solani</i>, <i>A. alternata</i>, <i>C. gloeosporioides</i>, <i>Fusarium solani</i>, <i>F. oxysporum</i> f. sp. <i>niveum</i>, <i>F. oxysporum</i> f. sp. <i>vasinfectum</i>, <i>G. saubinettii</i> (&gt;100)</p> <p>Positive control (MIC: µg/mL)</p> <p>carbendazim: 12.5, 12.5, 6.25, 6.25, 25, 12.5, 25, 6.25, respectively</p> <p>hymexazol: 12.5, 12.5, 12.5, 12.5, 50, 12.5, 2.5, 12.5, respectively</p> |  |
| Cyclo-(Ser-trans-4-OH-Pro) (238)        | <p>Antifungal activity (MIC: µg/mL) [32]</p> <p><i>B. cinerea</i>, <i>A. solani</i>, <i>A. alternata</i>, <i>C. gloeosporioides</i>, <i>Fusarium solani</i>, <i>F. oxysporum</i> f. sp. <i>niveum</i>, <i>F. oxysporum</i> f. sp. <i>vasinfectum</i>, <i>G. saubinettii</i> (&gt;100)</p> <p>Positive control (MIC: µg/mL)</p> <p>carbendazim: 12.5, 12.5, 6.25, 6.25, 25, 12.5, 25, 6.25, respectively</p> <p>hymexazol: 12.5, 12.5, 12.5, 12.5, 50, 12.5, 2.5, 12.5, respectively</p> |  |
| Cyclo-(Leu-4-OH-Pro) (239)              | <p>Antifungal activity (MIC: µg/mL) [32]</p>                                                                                                                                                                                                                                                                                                                                                                                                                                            |  |



|                                  |                                                                                                                                                                                                                                                                                                                                                                                                                                                                                         |  |
|----------------------------------|-----------------------------------------------------------------------------------------------------------------------------------------------------------------------------------------------------------------------------------------------------------------------------------------------------------------------------------------------------------------------------------------------------------------------------------------------------------------------------------------|--|
|                                  | <p><i>B. cinerea</i>, <i>A. solani</i>, <i>A. alternata</i>, <i>C. gloeosporioides</i>, <i>Fusarium solani</i>, <i>F. oxysporum</i> f. sp. <i>niveum</i>, <i>F. oxysporum</i> f. sp. <i>vasinfectum</i>, <i>G. saubinettii</i> (&gt;100)</p> <p>Positive control (MIC: µg/mL)</p> <p>carbendazim: 12.5, 12.5, 6.25, 6.25, 25, 12.5, 25, 6.25, respectively</p> <p>hymexazol: 12.5, 12.5, 12.5, 12.5, 50, 12.5, 2.5, 12.5, respectively</p>                                              |  |
| Cyclo-(Ala-trans-4-OH-Pro) (240) | <p>Antifungal activity (MIC: µg/mL) [32]</p> <p><i>B. cinerea</i>, <i>A. solani</i>, <i>A. alternata</i>, <i>C. gloeosporioides</i>, <i>Fusarium solani</i>, <i>F. oxysporum</i> f. sp. <i>niveum</i>, <i>F. oxysporum</i> f. sp. <i>vasinfectum</i>, <i>G. saubinettii</i> (&gt;100)</p> <p>Positive control (MIC: µg/mL)</p> <p>carbendazim: 12.5, 12.5, 6.25, 6.25, 25, 12.5, 25, 6.25, respectively</p> <p>hymexazol: 12.5, 12.5, 12.5, 12.5, 50, 12.5, 2.5, 12.5, respectively</p> |  |
| Cyclo-(cis-OH-D-Pro-L-Phe) (241) | <p>Antifungal activity (MIC: µg/mL) [32]</p> <p><i>B. cinerea</i>, <i>A. solani</i>, <i>A. alternata</i>, <i>C. gloeosporioides</i>, <i>Fusarium solani</i>, <i>F. oxysporum</i> f. sp. <i>niveum</i>, <i>F. oxysporum</i> f. sp. <i>vasinfectum</i>, <i>G. saubinettii</i> (&gt;100)</p> <p>Positive control (MIC: µg/mL)</p> <p>carbendazim: 12.5, 12.5, 6.25, 6.25, 25, 12.5, 25, 6.25, respectively</p> <p>hymexazol: 12.5, 12.5, 12.5, 12.5, 50, 12.5, 2.5, 12.5, respectively</p> |  |
| Cyclo-(Gly-Phe) (242)            | <p>Antifungal activity (MIC: µg/mL) [32]</p> <p><i>B. cinerea</i>, <i>A. solani</i>, <i>A. alternata</i>, <i>C. gloeosporioides</i>, <i>Fusarium solani</i>, <i>F. oxysporum</i> f. sp. <i>niveum</i>, <i>F. oxysporum</i> f. sp. <i>vasinfectum</i>, <i>G. saubinettii</i> (&gt;100)</p> <p>Positive control (MIC: µg/mL)</p> <p>carbendazim: 12.5, 12.5, 6.25, 6.25, 25, 12.5, 25, 6.25, respectively</p> <p>hymexazol: 12.5, 12.5, 12.5, 12.5, 50, 12.5, 2.5, 12.5, respectively</p> |  |
| Cyclo-(Pro-trans-4-OH-Pro) (243) | <p>Antifungal activity (MIC: µg/mL) [32]</p> <p><i>B. cinerea</i>, <i>A. solani</i>, <i>A. alternata</i>, <i>C. gloeosporioides</i>, <i>Fusarium solani</i>, <i>F. oxysporum</i> f. sp. <i>niveum</i>, <i>F. oxysporum</i> f. sp. <i>vasinfectum</i>, <i>G. saubinettii</i> (&gt;100)</p> <p>Positive control (MIC: µg/mL)</p> <p>carbendazim: 12.5, 12.5, 6.25, 6.25, 25, 12.5, 25, 6.25, respectively</p> <p>hymexazol: 12.5, 12.5, 12.5, 12.5, 50, 12.5, 2.5, 12.5, respectively</p> |  |
| Cyclo-(Gly-Ala) (244)            | <p>Antifungal activity (MIC: µg/mL) [32]</p> <p><i>B. cinerea</i>, <i>A. solani</i>, <i>A. alternata</i>, <i>C. gloeosporioides</i>, <i>Fusarium solani</i>, <i>F. oxysporum</i> f. sp. <i>niveum</i>, <i>F. oxysporum</i> f. sp. <i>vasinfectum</i>, <i>G. saubinettii</i> (&gt;100)</p> <p>Positive control (MIC: µg/mL)</p> <p>carbendazim: 12.5, 12.5, 6.25, 6.25, 25, 12.5, 25, 6.25, respectively</p> <p>hymexazol: 12.5, 12.5, 12.5, 12.5, 50, 12.5, 2.5, 12.5, respectively</p> |  |
| Uracil (245)                     | <p>Antifungal activity (MIC: µg/mL) [32]</p> <p><i>B. cinerea</i>, <i>A. solani</i>, <i>A. alternata</i>, <i>C. gloeosporioides</i>, <i>Fusarium solani</i>, <i>F. oxysporum</i> f. sp. <i>niveum</i>, <i>F. oxysporum</i> f. sp. <i>vasinfectum</i>, <i>G. saubinettii</i> (&gt;100)</p> <p>Positive control (MIC: µg/mL)</p> <p>carbendazim: 12.5, 12.5, 6.25, 6.25, 25, 12.5, 25, 6.25, respectively</p> <p>hymexazol: 12.5, 12.5, 12.5, 12.5, 50, 12.5, 2.5, 12.5, respectively</p> |  |

**Table S3.** Cytotoxic Activity of compounds (**165–174**) against Several Cells [59].

| Cell                                  | Compound |      |      |      |      |      |      |      |      |      | Cont. |
|---------------------------------------|----------|------|------|------|------|------|------|------|------|------|-------|
|                                       | 165      | 166  | 167  | 168  | 169  | 170  | 171  | 172  | 173  | 174  |       |
| A375 (IC <sub>50</sub> $\mu$ M)       | >100     | >100 | 34.4 | 47.4 | 48.5 | 71.2 | 18.0 | 72.9 | 41.7 | 42   | 18.1  |
| AGS (IC <sub>50</sub> $\mu$ M)        | >100     | 80.2 | 21.8 | 94.2 | 69.8 | 82.2 | 91.5 | 55.0 | 27.4 | 92.4 | 15.4  |
| HCT-8 (IC <sub>50</sub> $\mu$ M)      | >100     | 62.2 | >100 | 7.5  | 4.4  | 4.2  | 1.0  | 0.3  | 4.7  | 0.6  | 22.0  |
| HCT-8/T (IC <sub>50</sub> $\mu$ M)    | >100     | 64.3 | 11.2 | 8.6  | 6.4  | 6.5  | 1.5  | 1.0  | 7.2  | 0.8  | 28.2  |
| A549 (IC <sub>50</sub> $\mu$ M)       | >100     | 42.9 | 27.6 | 6.4  | 4.0  | 3.3  | 1.0  | 0.6  | 2.0  | 0.6  | 12.1  |
| MDA-MB-231 (IC <sub>50</sub> $\mu$ M) | >100     | 62.8 | 44.6 | 3.4  | 6.3  | 5.5  | 7.5  | 1.0  | 3.7  | 1.0  | 6.3   |
| SMMC-7721 (IC <sub>50</sub> $\mu$ M)  | >100     | 87.4 | 29.3 | >100 | 76.0 | 99.8 | >100 | 68.5 | 50.8 | >100 | 10.7  |
| A2780 (IC <sub>50</sub> $\mu$ M)      | >100     | 61.1 | 8.6  | 7.1  | 3.8  | <1   | <1   | <1   | <1   | <1   | 8.5   |
